# Supplementary material for: Usual Clinical Practice for Early Supported Discharge after Stroke with Continued Rehabilitation at Home: An Observational Comparative Study
Source: PLoS One. 2015 Jul 17;10(7):e0133536. doi: 10.1371/journal.pone.0133536 (PMC4505888; doi:10.1371/journal.pone.0133536)
Supplement: S1 Dataset — (XLSX) [file pone.0133536.s001.xlsx]

## Sheet: inclusion
KOD	ålder	kön	MMSE	BImat pre	Katzmatpre	BIbadpre	Katzbadpre	BIperstoapre	BIpåavpre	Katzpåavpre	BItarmpre	Bblåsapre	Katzkontpre	BItoapre	Katztoapre	B!ssförfpre	Katzförfpre	Bförfpre	BItrapppre	Katzstädpre	Katzköppre	Katztransppre	Katzmatpre	Barthelpre	Katzperspre	Katztotpre	BImat0	Katzmat0	BIbad0	Katzbad0	BIperstoa0	BIpåav0	Katzpåav0	BItarm0	BIblåsa0	Katzkont0	BItoa0	Katztoa0	BIssförf0	Katzförf0	BIförf0	BItrapp0	Barthel0	Katzpers0	Afasi	Gång	gång_dich	FAImat	FAIdiska
NoESD	69	1	21	10	1	5	1	5	10	1	10	10	1	10	1	15	1	15	10	1	1	1	1	100	6	10	10	1	5	1	5	10	1	10	10	1	10	1	15	1	15		90	6	0	3	0	3	2
NoESD	58	2	29	10	1	5	1	5	10	1	10	10	1	10	1	15	1	15	10	1	1	1	1	100	6	10	10	1	5	1	5	10	1	10	10	1	10	1	15	1	15	10	100	6	0	3	0	3	2
NoESD	69	1	28	10	1	5	1	5	10	1	10	10	1	10	1	15	1	15	10	1	1	1	1	100	6	10	10	1	5	1	5	10	1	10	10	1	10	1	15	1	10	5	90	6	0	2	0	3	3
ESD	73	2		10	1	5	1	5	10	1	10	10	1	10	1	15	1	15	10	0	0	0	1	100	6	7	10	1	0	0	5	10	0	10	10	1	10	1	15	1	10		80	4	1	0	1	3	3
ESD	66	1	29	10	1	5	1	5	10	1	10	10	1	10	1	15	1	15	10	1	1	1	1	100	6	10	10	1	5	1	5	10	1	10	10	1	10	1	15	1	15	10	100	6	0	3	0	3	2
NoESD	65	2	29	10	1	5	1	5	10	1	10	10	1	10	1	15	1	15	10	1	1	1	1	100	6	10	10	1	5	1	5	10	1	10	10	1	10	1	15	1	15	10	100	6	0	3	0	3	3
NoESD	50	2	27	10	1	5	1	5	10	1	10	10	1	10	1	15	1	15	10	1	1	1	1	100	6	10	10	1	5	1	5	10	1	10	10	1	10	1	15	1	15		90	6	1	3	0	3	3
ESD	79	1	30	10	1	5	1	5	5	1	10	10	1	10	1	15	1	15	0	0	0	0	0	85	6	6	5	1	0	1	5	5	1	10	10	1	10	1	15	1	15	0	75	6		2	0	0	0
ESD	52	1	25	10	1	5	1	5	10	1	10	10	1	10	1	15	1	15	10	1	1	1	1	100	6	10	10	1	5	1	5	10	1	10	10	1	10	1	15	1	15	10	100	6	0	3	0	3	3
ESD	67	1	22	10	1	5	1	5	10	1	10	10	1	10	1	15	1	15	10	0	1	1	1	100	6	9	10	1	5	1	5	10	1	10	10	1	10	1	15	1	15	10	100	6	1	3	0	3	2
NoESD	80	2		10	1	5	1	5	10	1	10	10	1	10	1	15	1	15	10	1	1	1	1	100	6	10	10	1	0	0	5	10	0	10	10	1	10	1	15	1	15	10	95	4	2	3	0	3	0
NoESD	85	2	20	10	1	5	1	5	10	1	10	10	1	10	1	15	1	15	10	1	1	0	1	100	6	9	10	1	0	0	5	10	1	10	10	1	10	1	15	1	15	10	95	5	1	3	0
NoESD	78	1	28	10	1	5	1	5	10	1	10	10	1	10	1	15	1	15	10	1	1	1	1	100	6	10	5	1	0	1	5	10	1	10	10	1	10	1	15	1	5	5	75	6	0	2	0	3	3
NoESD	73	1		10	1	5	1	5	10	1	10	10	1	10	1	15	1	15	10	1	1	1	1	100	6	10	10	1	5	1	5	10	1	10	10	1	10	1	15	1	15	10	100	6	0		0	0	3
NoESD	65	1	28	10	1	5	1	5	10	1	10	10	1	10	1	15	1	15	10	1	1	1	1	100	6	10	10	1	5	1	5	5	0	10	10	1	10	1	15	1	10	5	85	5	0	2	0	3	3
NoESD	86	1	17	10	1	5	1	5	10	1	10	10	1	10	1	15	1	10	0	0	1	0	1	85	6	8	10	1	0	0	5	0	0	5	5	0	5	0	15	1	10	0	55	2	1	2	0	2	3
ESD	52	2	30	10	1	5	1	5	10	1	10	10	1	10	1	15	1	15	10	1	1	1	1	100	6	10	10	1	5	1	5	10	1	10	10	1	10	1	15	1	15	10	100	6	0		0	2	2
NoESD	33	2	30	10	1	5	1	5	10	1	10	10	1	10	1	15	1	15	10	1	1	1	1	100	6	10	10	1	5	1	5	10	1	10	10	1	10	1	15	1	15	10	100	6	1	3	0	3	3
NoESD	41	1	27	10	1	5	1	5	10	1	10	10	1	10	1	15	1	15	10	1	1	1	1	100	6	10	10	1	5	1	5	10	1	10	10	1	10	1	15	1	15	10	100	6	0	3	0	2	2
NoESD	75	1	27	10	1	10	1	1	10	1	10	10	1	10	1	15	1	15	5	1	1	1	1	96	6	10	10	1	5	1	5	10	1	10	10	1	10	1	15	1	10	5	90	6	0	2	0	0	0
NoESD	63	1	28	10	1	5	1	5	10	1	10	10	1	10	1	15	1	15	10	1	1	1	1	100	6	10	10	1	0	0	5	10	0	10	10	1	10	0	10	1	10	10	85	3	0	2	0	0	0
NoESD	82	1	30	10	1	5	1	5	10	1	5	10	1	10	1	15	1	15	10	1	1	1	1	95	6	10	10	1	5	1	5	10	1	5	10	1	10	1	15	1	15	10	95	6	0	3	0	3	3
NoESD	82	2	23	10	1	5	1	5	10	1	10	10	1	10	1	15	1	15	10	1	1	1	1	100	6	10	10	1	0	0	5	10	1	10	10	1	10	1	15	1	15	5	90	5	0		0	3	3
ESD	50	2																						100	6	10																	100	6	3		0
NoESD	78	2	24	10	1	5	1	5	10	1	10	10	1	10	1	15	1	15	10	1	1	1	1	100	6	10	10	1	5	1	5	10	1	10	10	1	10	1	15	1	15	10	100	6	0	3	0	3	3
NoESD	72	1	28	10	1	5	1	5	10	1	10	10	1	10	1	15	1	15	10	1	1	1	1	100	6	10	10	1	0	0	5	10	1	10	10	1	10	1	15	1	15	0	85	5	0	2	0	1	3
NoESD	71	1	29	10	1	5	1	5	10	1	10	10	1	10	1	15	1	15	10	1	1	1	1	100	6	10	10	1	5	1	5	10	1	10	10	1	10	1	15	1	15	10	100	6	0	3	0	1	2
ESD	84	1		10	1	5	1	5	10	1	10	10	1	10	1	15	1	15	10	1	1	1	1	100	6	10	10	1	0	0	5	5	1	10	10	1	5	1	15	1	15	10	85	5	0	3	0	2	2
NoESD	62	2		10	1	5	1	5	10	1	10	10	1	10	1	15	1	15	10	1	1	1	1	100	6	10	10	1	5	1	5	10	1	10	10	1	10	1	15	1	15	10	100	6	0	3	0	3	3
NoESD	71	2	30	10	1	5	1	5	10	1	10	10	1	10	1	15	1	15	10	1	1	1	1	100	6	10	10	1	5	1	5	10	1	10	10	1	10	1	15	1	15	5	95	6	0	1	1	1	3
ESD	68	2	30	10	1	5	1	5	10	1	10	10	1	10	1	15	1	15	10	1	1	1	1	100	6	10	10	1	5	1	5	10	1	10	10	1	10	1	15	1	15	10	100	6	0	3	0	3	3
ESD	66	2		10	1	5	1	5	10	1						15	1	15	10					70	4	4	5	1	0	0	5	5	1	10	10	1	5	1	15	1	15		70	5	3	3	0
NoESD	48	1	28	10	1	5	1	5	10	1	10	10	1	10	1	15	1	15	10	1	1	1	1	100	6	10	10	1	5	1	5	10	1	10	10	1	10	1	15	1	15	10	100	6	0	3	0	1	0
NoESD	85	2	28	10	1	5	1	5	10	1	10	10	1	10	1	15	1	15	10	0	0	1	1	100	6	8	10	1	5	1	5	10	1	10	10	1	10	1	15	1	10	5	90	6		2	0	0	3
NoESD	72	2	26	10	1	0	0	5	10	1	10	10	1	10	1	15	1	15	5	0	0	0	0	90	5	5	10	1	0	0	5	5	1	0	0	0	10	1	15	1	10	0	55	4	0	3	0	0	0
NoESD	77	2		10	1	5	1	5	10	1	10	10	1	10	1	15	1	15		1	1	1	1	90	6	10	10	1	5	1	5	10	1	10	10	1	10	1	15	1	15		90	6	2	3	0
NoESD	56	1	30	10	1	5	1	5	10	1	10	10	1	10	1	15	1	15	10	1	1	1	1	100	6	10	10	1	5	1	5	10	1	10	10	1	10	1	15	1	15		90	6	0	2	0	2	2
NoESD	68	1		10	1	5	1	5	10	1	10	10	1	10	1	15	1	15	10	1	1	1	1	100	6	10	10	1	5	1	5	5	1	10	0	0	10	1	15	1	15	10	85	5	2	3	0
NoESD	70	2		10	1	5	1	5	10	1	10	10	1	10	1	15	1	15	10	1	1	1	1	100	6	10	10	1	5	1	5	10	1	10	10	1	10	1	15	1	15	10	100	6	0	3	0	3	3
NoESD	71	1	30	10	1	5	1	5	10	1	10	10	1	10	1	15	1	15	10	0	1	1	1	100	6	9	10	1	5	1	5	10	1	10	10	1	10	1	15	1	15		90	6	0	3	0	3	3
ESD	90	2	22	10	1	5	1	5	10	1	10	10	1	10	1	15	1	15	10	0	1	1	1	100	6	9	10	1			5	10	1	10	10	1	10	1	15	1	10		80	5	0	2	0	3	3
NoESD	82	2	25	10	1	5	1	5	10	1	10	10	1	10	1	15	1	15	10	0	0	0	0	100	6	6	5	1	0	1	5	5		10	5	1	10	1	15	1	10		65	5	0	2	0	3	3
NoESD	61	1	26	10	1	5	1	5	10	1	10	10	1	10	1	15	1	15	10	1	1	1	1	100	6	10	10	1	0	0	5	10	1	10	10	1	5	0	15	1	10		75	4	0	2	0	2	2
NoESD	74	2	29	10	1	5	1	5	10	1	10	10	1	10	1	15	1	15	10	1	1	1	1	100	6	10	5	1	0	0	5	5	0	10	10	1	10	0	15	1	10		70	3	0	1	1	3	3
NoESD	70	1	27	10	1	5	1	5	10	1	10	10	1	10	1	15	1	15	10	1	1	1	0	100	6	9	10	1	5	1	5	10	1	10	10	1	10	1	15	1	10		85	6	0	ej testat	0	0	3
NoESD	77	2	21	10	1	5	1	5	10	1	10	10	1	10	1	15	1	15	10	1	1	1	1	100	6	10	10	1	5	1	5	10	1	10	10	1	10	1	15	1	15	10	100	6	0	3	0	3	3
NoESD	77	2	27	10	1	5	1	5	10	1	10	10	1	10	1	15	1	15	10	1	1	1	1	100	6	10	10	1	5	1	5	10	1	10	10	1	10	1	15	1	15		90	6	1	3	0	3	3
NoESD	82	2		10	1	0	0	5	10	1	10	10	1	10	1	15	1	10	10	0	0	0	1	90	5	6	10	1	0	0	5	5	0	10	10	1	10	0	15	1	10	5	80	3	1	2	0	3	3
NoESD	88	2	25	10	1	5	1	5	10	1	10	10	1	10	1	15	1	15	5	0	0	0	1	95	6	7	10	1	5	1	5	10	1	10	10	1	10	1	15	1	15	0	90	6	1	2	0	3	0
NoESD	80	2	29	10	1	5	1	5	10	1	10	10	1	10	1	15	1	15	10	1	1	1	1	100	6	10	10	1	5	1	5	10	1	10	10	1	10	1	15	1	10		85	6	0	2	0	3	3
NoESD	62	2	28	10	1	5	1	5	10	1	10	10	1	10	1	15	1	15	10	1	1	1	1	100	6	10	10	1	5	1	5	10	1	10	10	1	10	1	15	1	15	10	100	6	0	3	0	2	2
NoESD	50	1	29	10	1	5	1	5	10	1	10	10	1	10	1	15	1	15	10	1	1	1	1	100	6	10	10	1	5	1	5	10	1	10	10	1	10	1	15	1	15	10	100	6	0	3	0	3	3
NoESD	69	1	26	10	1	5	1	5	10	1	10	10	1	10	1	15	1	15	0	1	1	1	1	90	6	10	10	1	5	1	5	10	1	10	10	1	10	1	15	1	15	0	90	6	0	3	0	3	3
ESD	68	1	27	10	1	5	1	5	10	1	10	10	1	10	1	15	1	15	10	1	1	1	0	100	6	9	10	1	5	1	5	5	1	10	10	1	10	1	15	1	15	10	95	6	0	3	0	2	0
NoESD	81	2	20	10	1	5	1	5	10	1	10	0	1	10	1	15	1	15	10	0		1	1	90	6	8	10	1	5	1	5	10	1	10	0	0	10	1	15	1	15	10	90	5	0	3	0	3	3
NoESD	69	2	30	10	1	5	1	5	10	1	10	10	1	10	1	15	1	15	10	1	1	1	1	100	6	10	10	1	5	1	5	10	1	10	10	1	10	1	15	1	15	10	100	6	0	3	0	2	2
ESD	60	2	28	10	1	5	1	5	10	1	10	10	1	10	1	15	1	15	10	1	1	1	1	100	6	10	10	1	5	1	5	10	1	10	10	1	10	1	15	1	15	10	100	6	1	3	0	3	3
NoESD	57	2	20	10	1	5	1	5	10	1	10	10	1	10	1	15	1	15	10	0	1	1	1	100	6	9	10	1	0	0	0	5	0	5	0	0	10	0	15	1	10	0	55	2	1	3	0	2	2
NoESD	64	1	28	10	1	5	1	5	10	1	10	10	1	10	1	15	1	15	10	1	1	1	1	100	6	10	10	1	5	1	5	5	1	10	10	1	10	1	15	1	10	10	90	6	0	3	0	2	3
NoESD	82	1	26	10	1	5	1	5	10	1	5	10	1	10	1	15	1	15	10	0	0	1	1	95	6	8	10	1	5	1	5	10	1	5	10	1	10	1	15	1	10		80	6	0	2	0	0	2
NoESD	57	1	25	10	1	5	1	5	10	1	10	10	1	10	1	15	1	15	10	0	1	1	0	100	6	8	5	1	0	0	5	10	1	10	10	1	10	1	15	1	15	5	85	5	0	3	0	0	3
ESD	69	1	22	10	1	5	1	5	10	1	10	10	1	10	1	15	1	15	10	1	1	1	0	100	6	9	10	1	5	1	5	10	1	10	10	1	10	1	15	1	10	10	95	6	0		0	1	2
NoESD	71	1		10	1	5	1	5	10	1	10	10	1	10	1	15	1	15	10	1	1	1	1	100	6	10	10	1	5	1	5	5	1	10	10	1	10	1	15	1	15	10	95	6	0		0	2	2
NoESD	77	1	29	10	1	5	1	5	10	1	10	10	1	10	1	15	1	15	10	1	1	1	1	100	6	10	10	1	5	1	5	10	1	10	10	1	10	1	15	1	15	10	100	6	0		0	3	3
NoESD	84	1		10	1	5	1	5	10	1	10	10	1	10	1	15	1	15	10	1	1	1	1	100	6	10	10	1	5	1	5	10	1	10	10	1	10	1	15	1	10	5	90	6	0		1	1	3
ESD	56	2	29	10	1	5	1	5	10	1	10	10	1	10	1	15	1	15	10	1	1	1	1	100	6	10	10	1	5	1	5	10	1	10	10	1	10	1	15	1	15	10	100	6	0	3	0	3	3
ESD	78	2		10	1	5	1	5	10	1	10	10	1	10	1	15	1	15	10	1	1	1	1	100	6	10	10	1	0	0	0	5	0	10	10	1	10	1	15	1	10	5	75	4	2	3	0	3	3
NoESD	62	2	27	10	1	5	1	5	10	1	10	10	1	10	1	15	1	10	0	0	0	0	0	85	6	6	10	1	0	0	5	10	0	5	10	1	10	1	15	1	0	0	65	4	0	1	1	2	3
ESD	81	1	24	10	1	5	1	5	10	0	10	10	1	10	1	15	1	10	10	1	1	1	1	95	5	9	10	1	0	0	5	10	0	10	10	1	10	1	15	1	10	0	80	4	1	3	0	3	3
ESD	78	1	20	10	1	5	1	5	10	1	10	10	1	10	1	15	1	15	10	1	1	1	1	100	6	10	10	1	5	1	5	10	1	10	10	1	10	1	15	1	15	10	100	6	1	3	0	1	3
ESD	74	2	25	10	1	5	1	5	5	0	10	10	1	10	1	15	1	15	10	1		0	1	95	5	7	10	1	5	1	5	5	0	10	10	1	10	1	15	1	15	10	95	5	1	3	0	3	1
NoESD	49	1	29	10	1	5	1	5	10	1	10	10	1	10	1	15	1	15	10	1	1	1	1	100	6	10	10	1	5	1	5	10	0	10	10	1	10	1	15	1	5	0	80	5	0	1	1	3	3
NoESD	48	2	27	10	1	5	1	5	10	1	10	10	1	10	1	15	1	15	10	1	1	1	1	100	6	10	10	1	5	0	5	10	1	10	10	1	10	1	15	1	15	10	100	5	0	1	1	3	3
NoESD	48	1	30	10	1	5	1	5	10	1	10	10	1	10	1	15	1	15	10	1	1	1	1	100	6	10	5	1	0	0	5	0	0	10	10	1	5	0	15	1	15		65	3	0		0	3	3
NoESD	75	2	28	10	1	5	1	5	10	1	10	10	1	10	1	15	1	15	10	1	0		1	100	6	8	10	1	5	1	5	10	1	10	10	1	10	1	15	1	15	10	100	6	0	2	0	3	2
NoESD	58	1	28	10	1	5	1	5	10	1	10	10	1	10	1	15	1	15	10	1	1	1	1	100	6	10	10	1	5	1	5	10	1	10	10	1	10	1	15	1	15	10	100	6	0	3	0	3	3
ESD	78	2	29	10	1	5	1	5	10	1	10	10	1	10	1	15	1	10	0	0	0	0	1	85	6	7	10	1	0	0	5	10	1	5	10	1	10	1	15	1	10	0	75	5	0	2	0	3	3
ESD	78	1	21	10	1	5	1	5	10	1	10	10	1	10	1	15	1	15	10	1	1	1		100	6	9	5	1	0		5	10	1	10	10	1	10	1	15	1	15	5	85	5	1	3	0	0	3
NoESD	41	1	25	10	1	5	1	5	10	1	10	10	1	10	1	15	1	15	10	1	1	1	1	100	6	10	10	1	5	1	5	10	1	10	10	1	10	1	15	1	15	10	100	6	1	3	0	3	2
ESD	64	2	29	10	1	5	1	5	10	1	10	10	1	10	1	15	1	15	10	0	1	1	1	100	6	9	10	1	5	1	5	10	1	10	10	1	10	1	15	1	10	5	90	6	0	3	0	3	2
NoESD	37	2	29	10	1	5	1	5	10	1	10	10	1	10	1	15	1	15	10	1	1	1	1	100	6	10	10	1	5	1	5	10	1	10	10	1	10	1	15	1	10	5	90	6	0	3	0	3	3
NoESD	86	2	25	10	1	5	1	5	10	1	10	10	1	10	1	15	1	15	10	1	0	1	1	100	6	9	5	1	0	0	5	5	0	10	10	1	10	1	15	1	15		75	4	0	3	0	3	3
NoESD	54	2	22	10	1	5	1	5	10	1	10	10	1	10	1	15	1	15	10	1	1	1	1	100	6	10	5	1	0	0	5	10	1	10	10	1	10	1	15	1	10		75	5	0	1	1	3	0
NoESD	71	1	20	10	1	5	1	5	10	1	10	10	1	10	1	15	1	15	10	0	1	1	1	100	6	9	10	1	0	1	5	10	1	10	10	1	10	1	15	1	15		85	6	0	2	0	3	3
ESD	62	2	29	10	1	5	1	5	10	1	10	10	1	10	1	15	1	15	10	1	1	1	1	100	6	10	10	1	0	0	5	10	1	10	10	1	10	1	15	1	10	5	85	5	0	2	0	3	3
ESD	75	2	25	10	1	5	1	5	10	1	10	10	1	10	1	15	1	15	10	1	1	1	1	100	6	10	10	1			5	10	1	5	10	1	10	1	15	1	15		80	5	1	3	0	3	3
NoESD	53	1	28	5	1	0	1	5	5	1	10	10	1	10	1	15	1	15	10	0	0	0	0	85	6	6	5	1	0	1	5	0	0	10	10	1	10	1	15	1	10	0	65	5	0	3	0	0	3
ESD	52	2	25	10	1	5	1	5	10	1	10	10	1	10	1	15	1	15	10	1	1	1	1	100	6	10	5	1	0	0	0	0	0	10	5		5	0	15	1	10	0	50	2	1	1	1	3	3
ESD	73	2	30	10	1	5	1	5	10	1	10	10	1	10	1	15	1	15	10	1	1	1	1	100	6	10	10	1	5	1	5	10	1	10	10	1	10	1	15	1	10	10	95	6	0	2	0	3	3
ESD	81	1	30	10	1	5	1	5	10	1	10	10	1	10	1	15	1	15	10	1	1	1	1	100	6	10	10	1	5	1	5	10	1	10	10	1	10	1	15	1	15	10	100	6	0	3	0	3	3
NoESD	50	2	22	10	1	5	1	5	10	1	10	10	1	10	1	15	1	15	10	1	1	1	1	100	6	10	10	1	5	1	5	5	0	10	10	1	10	1	15	1	15	10	95	5	1	3	0	2	3
NoESD	78	1	24	10	1	5	1	5	10	1	10	10	1	10	1	15	1	15	5	0	1	1	0	95	6	8	10	1	5	1	5	10	1	10	10	1	10	1	15	1	15	5	95	6	1	3	0	1	3
ESD	82	1	23	10	1	5	1	5	10	1				10	1	15	1	15	10	0	1	1	0	80	5	7	10	1	5	1	5	10	1				10	1	15	1	10	0	65	5	0	2	0	0	3
NoESD	87	1	28	10	1	5	1	5	10	1	10	10	1	10	1	15	1	15	10	1	1	1	1	100	6	10	10	1	5	1	5	10	1	10	10	1	10	1	15	1	15	10	100	6	0	1	1	1	2
NoESD	81	2	27	10	1	5	1	5	10	1	10	10	1	10	1	15	1	15	10	1	0	0	1	100	6	8	10	1	0	0	5	10	1	10	10	1	10	1	15	1	10	5	85	5	0		1	3	2
NoESD	87	2	20	10	1	5	1	5	10	1	10	10	1	10	1	15	1	10	5	0	0	0	0	90	6	6	10	1	0	0	5	10	1	10	10	1	10	1	15	1	10		80	5	0	2	0
NoESD	60	1	29	10	1	5	1	5	10	1	10	10	1	10	1	15	1	15	10	1	1	1	1	100	6	10	5	1	5	1	5	10	1	10	10	1	10	1	15	1	15	5	90	6	0	3	0	3	3
NoESD	56	1	29	10	1	5	1	5	10	1	10	10	1	10	1	15	1	15	10	1	1	1	1	100	6	10	5	1	5	1	5	5	1	10	10	1	10	1	15	1	10		75	6	0	1	1	2	2
NoESD	79	1	28	10	1	5	1	5	10	1	10	10	1	10	1	15	1	15	10	1	1	1	1	100	6	10	10	1	5	1	5	10	1	10	10	1	10	1	15	1	10	5	90	6	0	3	0	2	3
NoESD	89	2		10	1	5	1	5	10	1	10	10	1	10	1	15	1	15	10	0	1	1	1	100	6	9	10	1	5	1	5	10	1	10	10	1	10	1	15	1	15	10	100	6	0	2	0	3	3
ESD	63	1	30	10	1	5	1	5	10	1	10	10	1	10	1	15	1	15	10	1	1	1	1	100	6	10	10	1	5	1	5	10	1	10	10	1	10	1	15	1	15	10	100	6	0	3	0	1	2
NoESD	75	1	26	10	1	5	1	5	10	1	10	10	1	10	1	15	1	15	10	1	1	1	1	100	6	10	10	1	5	1	5	10	1	10	10	1	10	1	15	1	15	10	100	6	0	3	0	0	3
NoESD	52	1	14	10	1	5	1	5	10	1	10	10	1	10	1	15	1	15	10	1	1	1	1	100	6	10	10	1	5	1	5	10	1	10	10	1	10	1	15	1	15	10	100	6	2	3	0	3	3
ESD	77	1	29	10	1	5	1	5	10	1	10	10	1	10	1	15	1	15	10	1	1	1	1	100	6	10	10	1	5	1	5	10	1	10	10	1	10	1	15	1	15	10	100	6	0	3	0	1	3
NoESD	62	1	25	10	1	5	1	5	10	1	10	10	1	10	1	15	1	15	10	1	1	1	1	100	6	10	10	1	5	1	5	10	1	10	10	1	10	1	15	1	15		90	6	0	3	0	1	1
NoESD	84	2	22	10	1	0	0	5	10	1				10	1	15	1	10	10	0	0	0	1	70	4	5	10	1	0	0	5	5	1	5	5	1	10	1	15	1	10	0	65	5	0	2	0	3	3
NoESD	63	1		10	1	5	1	5	10	1	10	10	1	10	1	15	1	15	10	0	0	1	1	100	6	8	10	1	0	1	5	10	1	10	10	1	10	1	15	1	15		85	6	2		0	3	3
NoESD	63	1		10	1	5	1	5	10	1	10	10	1	10	1	15	1	15	10	0	1	1	1	100	6	9	10	1	0	1	5	10	1	10	10	1	10	1	15	1	10		80	6	0	1	1	3	1
NoESD	62	1	29	10	1	5	1	5	10	1	10	10	1	10	1	15	1	15	10	1	1	1	1	100	6	10	10	1	5	1	5	10	1	10	10	1	10	1	15	1	15	10	100	6	0	3	0	1	2
NoESD	68	2		10	1	5	1	5	10	1	10	10	1	10	1	15	1	15	10	1	1	1	1	100	6	10	10	1	5	1	5	10	1	10	10	1	10	1	15	1	15		90	6	0	2	0	3	3
NoESD	24	1		10	1	5	1	5	10	1	10	10	1	10	1	15	1	15	10	1	1	1	1	100	6	10	5	1	5	1	5	5	0	10	10	1	10	1	15	1	15	10	90	5	0	3	0
NoESD	84	2	13	10	1	5	1	5	10	1	10	10	1	10	1	15	1	15	10	1	0	0	1	100	6	8	10	1	0	0	5	10	1	10	10	1	10	1	15	1	10		80	5	1	2	0	3	3
NoESD	91	2	26	10	1	5	1	5	10	1	10	10	1	10	1	15	1	15	10	1	1	0	1	100	6	9	10	1	0	0	5	10	1	10	10	1	10	1	15	1	10	5	85	5	0	2	0	3	3
NoESD	88	1	20	10	1	5	1	5	10	1	10	10	1	10	1	15	1	10	5	1	0	1	0	90	6	8	10	1	0	1	5	5	1	10	5	1	10	1	15	1	15		75	6		2	0
NoESD	84	1	26	10	1	5	1	5	10	1	10	10	1	10	1	15	1	15	10	1	1	1	1	100	6	10	10	1	5	1	5	10	1	10	10	1	10	1	15	1	15	10	100	6	0	3	0	2	3
NoESD	70	2	27	10	1	5	1	5	10	1	10	10	1	10	1	15	1	15	10	1	1	1	1	100	6	10	10	1	5	1	5	10	1	10	10	1	10	1	15	1	15	10	100	6	0	3	0	3	3
NoESD	51	1		10	1	5	1	5	10	1	10	10	1	10	1	15	1	15	10	1	0	0	1	100	6	8	10	1	5	1	5	10	1	10	10	1	10	1	15	1	15	10	100	6	0	3	0
ESD	73	1	20	10	1	5	1	5	10	1	10	10	1	10	1	15	1	15	10	1	1	0	0	100	6	8	10	1	5	1	5	10	1	10	10	1	10	1	15	1	15	10	100	6	1	3	0	2	2
NoESD	71	1	19	10	1	5	1	5	10	1	10	10	1	10	1	15	1	10	10	1	1	1	1	95	6	10	10	1	5	1	5	10	1	10	10	1	10	1	15	1	10	5	90	6	0	2	0	3	2
NoESD	43	1	23	10	1	5	1	5	10	1	10	10	1	10	1	15	1	15	10	1	1	1	1	100	6	10	5	0	0	0	5	5	0	5	0	0	10	1	15	1	5	0	50	2	1	0	1	3	3
NoESD	42	1	27	10	1	5	1	5	10	1	10	10	1	10	1	15	1	15	10	1	1	1	1	100	6	10	10	1	5	1	5	10	1	10	10	1	10	1	15	1	15	5	95	6	0	2	0	3	2
ESD	83	1	30	10	1	5	1	5	10	1	10	10	1	10	1	15	1	15	10	1	1	1	1	100	6	10	10	1	0	0	5	5	0	10	10	1	10	1	15	1	10	0	75	4	0	2	0	3	3
NoESD	66	1	15	10	1	5	1	5	10	1	10	10	1	10	1	15	1	15	10	0	1	1	1	100	6	9	10	1	0	0	5	5	0	10	10	1	10	1	15	1	15	10	90	4	2	3	0
NoESD	63	1	24	10	1	5	1	5	10	1	10	10	1	10	1	15	1	15	10	1	1	1	1	100	6	10	10	1	5	1	5	10	1	10	10	1	10	1	15	1	15	10	100	6	0	3	0	0	3
NoESD	79	1	25	10	1	5	1	5	10	1	10	10	1	10	1	15	1	15	10	0	1	1	1	100	6	9	5	1	0	0	5	10	1	10	10	1	10	1	15	1	10	5	80	5	0	2	0	3	3
NoESD	75	2	27	10	1	5	1	5	10	1	10	10	1	10	1	15	1	15	10	1	1	1	1	100	6	10	10	1	5	1	5	10	1	10	10	1	10	1	15	1	15	10	100	6		3	0	3	2
NoESD	83	1	16	10	1	5	1	5	10	1	10	10	1	10	1	15	1	15	10	1	1	1	1	100	6	10	10	1	5	1	5	10	1	10	10	1	10	1	15	1	15		90	6	0	3	0	3	3
NoESD	52	1	19	10	1	5	1	5	10	1	10	10	1	10	1	15	1	15	10	1	1	1	1	100	6	10	10	1	5	1	5	10	1	10	10	1	10	1	15	1	15	10	100	6	1	3	0	2	3
ESD	70	1	29	10	1	5	1	5	10	1	10	10	1	10	1	15	1	15	10	1	1	1	0	100	6	9	10	1	5	1	5	5	1	10	10	1	10	1	15	1	15		85	6	0	3	0	0	2
NoESD	71	1	30	10	1	5	1	5	10	1	10	10	1	10	1	15	1	15	10	1	1	1	1	100	6	10	10	1	5	1	5	10	1	10	10	1	10	1	15	1	15	10	100	6	0	3	0	3	3
NoESD	38	1	27	10	1	5	1	5	10	1	10	10	1	10	1	15	1	15	10	1	1	1	1	100	6	10	10	1	5	1	5	10	1	10	10	1	10	1	15	1	15	10	100	6	0	3	0	3	3
NoESD	72	2	26	10	1	5	1	5	10	1	10	10	1	10	1	15	1	10	10	1	1	0	1	95	6	9	10	1	5	1	5	10	1	10	10	1	10	1	15	1	15	10	100	6	0	2	0	3	3
NoESD	71	2	25	10	1	5	1	5	10	1	10	10	1	10	1	15	1	15	10	0	1	0	1	100	6	8	10	1	0	0	5	10	1	10	10	1	10	1	15	1	10		80	5	0	2	0	2	3
NoESD	86	1	22	10	1	5	1	5	10	1	10	10	1	10	1	15	1		10	0	0	0	0	85	6	6	10	1	5	1	5	10	1	10	10	1	10	1	15	1	10		85	6	0	2	0	0	3
NoESD	65	1	27	10	1	5	1	5	10	1	10	10	1	10	1	15	1	15	10	1	1	1	1	100	6	10	10	1	5	1	5	10	1	10	10	1	10	1	15	1	15	10	100	6	0	3	0	0	3
NoESD	63	1	26	10	1	5	1	5	10	1	10	10	1	10	1	15	1	15	10	0	1	1	0	100	6	8	10	1	5	1	5	10	1	10	10	1	10	1	15	1	15	10	100	6	0	3	0	1	1
ESD	63	2		10	1	5	1	5	10	1	10	10	1	10	1	15	1	15	10	1	1	1	1	100	6	10	10	1	5	0	5	10	0	10	10	1	10	1	15	1	15		90	4	2	1	1	3	3
ESD	41	2		10	1	5	1	5	10	1	10	10	1	10	1	15	1	15	10	1	1	1	1	100	6	10	5	1	0	0	0	5	0	10	10	1	5	0	15	1	10	0	60	3	3	2	0	3	3
ESD	59	1	27	10	1	5	1	5	10	1	10	10	1	10	1	15	1	15	10	1	1	1	1	100	6	10	10	1	5	1	5	10	1	10	10	1	10	1	15	1	15	10	100	6	0	3	0	0	3
ESD	79	1		10	1	5	1	5	10	1	10	10	1	10	1	15	1	15	0	1	1	1	1	90	6	10	10	1	5	1	5	10	1	10	10	1	10	1	15	1	10	0	85	6	0	2	0	3	3
ESD	81	1	23	10	1	5	1	5	10	1	10	10	1	10	1	15	1	15	10	0	0	1	0	100	6	7	10	1	0	0	5	10	1	10	10	1	10	1	15	1	15	5	90	5	0	3	0	0	3
NoESD	43	1	29	10	1	5	1	5	10	1	10	10	1	10	1	15	1	15	10	1	1	1	1	100	6	10	10	1	5	1	5	10	1	10	10	1	10	1	15	1	10		85	6	0	2	0	3	3
NoESD	57	2		10	1	5	1	5	10	1	10	10	1	10	1	15	1	15	10	1	1	1	1	100	6	10	10	1	0	0	5	5	0	10	10	1	5	0	15	1	10	0	70	3	3	1	1	2	3
ESD	57	1	21	10	1	5	1	5	10	1	10	10	1	10	1	15	1	15	10	1	1	1	1	100	6	10	10	1	5	1	5	0	0	10	10	1	5	0	15	1	15		75	4	0	3	0	3	3
NoESD	24	2		10	1	5	1	5	10	1	10	10	1	10	1	15	1	15	10	1	1	1	1	100	6	10	10	1	5	1	5	10	1	10	10	1	10	1	15	1	15	10	100	6	2	3	0	3	3
NoESD	91	1	25	10	1	5	1	5	10	1	10	10	1	10	1	15	1	15	10	1	1	1	1	100	6	10	10	1	0	1	5	10	1	10	10	1	10	1	15	1	10	5	85	6	0	2	0	3	3
ESD	93	2	23	10	1	5	1	5	10	1	10	10	1	10	1	15	1	15	10	1	1		1	100	6	9	10	1	0	0	5	10	1	10	10	1	10	1	15	1	10		80	5	0	1	1	3	3
NoESD	77	2	24	10	1	5	1	5	10	1	10	10	1	10	1	15	1	15	10	1	0		1	100	6	8	0	0	5	1	5	10	1	10	10	1	10	1	15	1	15	10	90	5	1	3	0	3	2
NoESD	71	1	29	10	1	5	1	5	10	1	10	10	1	10	1	15	1	15	10	1	1	1	0	100	6	9	10	1	5	1	5	10	1	10	10	1	10	1	15	1	15	10	100	6	0		0	0	2
NoESD	59	1	27	10	1	5	1	5	10	1	10	10	1	10	1	15	1	15	10	1	1	1	1	100	6	10	10	1	5	1	5	10	1	10	10	1	10	1	15	1	15	10	100	6	0	3	0	3	2
[truncated: 23 more columns]

## Sheet: 3 months
KOD	BImat3m	Katzmat3	BIbad3	Katzbad3	BIperstoa3	BIpåav3	Katzpåav3	BItarm3	BIblåsa3	Katzkont3	BItoa3	Katztoa3	BIssförf3	Katzförf3	BIförf3	BItrapp3	Barthel3	gång	Katzpers3	Katzstäd3	Katzuppk3	Katztransp3	Katzmatlag3	Katztot3	FAImat3	FAIdisk3	FAItvätt3	FAIlätthush3	FAItungh3	FAIhandl3	FAIsoc3	FAIprom3	FAIhobby3	FAIkomm3	FAIutflykt3	FAIträdgård3	FAIhush3	FAIböcker3	FAIförv3	FAItot3m	ändringbo3	boende	hemtj3	larm3	CGBS31	CGBS32	CGBS33	CGBS34	CGBS35
NoESD	10	1	5	1	5	10	1	10	10	1	10	1	15	1	15	10	100	0	6	1	1	1	1	10	1	1	0	1	0	2	1	3	3	0	3	2	2	2	0	21	2	0	2	1	3	2	2	2	2
NoESD	10	1	5	1	5	10	1	10	10	1	10	1	15	1	15	10	100	0	6	1	1	1	1	10	1	2	3	3	2	3	2	3	3	3	2	1	1	3	1	33	2	0	2	2
NoESD	10	1	5	1	5	10	1	10	10	1	10	1	15	1	15	5	95	0	6	0	0	0	1	7	2	0	0	0	0	0	2	0	0	0	0	1	1	2	0	8	2	0	2	2	1	1	1	3	3
ESD	10	1	5	1	5	10	1	10	10	1	10	1	15	1	15	5	95	0	6	0	0	0	1	7	2	2	0	2	0	0	0	0	0	0	0	0	0	0	0	6	2	0	1	1	3	3	4	3	2
ESD	10	1	5	1	5	10	1	10	10	1	10	1	15	1	15	10	100	0	6	1	1	1	1	10	3	3	3	3	3	3	3	3	0	3	3	1	2	2	0	35	2	0	2	2
NoESD	10	1	5	1	5	10	1	10	10	1	10	1	15	1	15	10	100	0	6	1	1	1	1	10	3	3	3	3	2	3	3	3	3	3	2	1	1	2	0	35	2	0	2	2
NoESD	10	1	5	1	5	10	1	10	10	1	10	1	15	1	15	10	100	0	6	1	1	1	1	10	2	3	3	3	3	3	3	3	1	3	3	1	1	2	2	36	2	0	2	2
ESD	10	1	5	1	5	10	1	10	10	1	10	1	15	1	15	10	100	0	6	0	0	0	0	6	0	0	0	1	0	0	0	2	2	0	1	0	0	0	0	6	2	0	2	2	4	4	4	3	2
ESD																				0	0
ESD	10	1	5	1	5	10	1	5	5	1	10	1	15	1	15	5	85	0	6	0	0	1	1	8	0	1	0	0	0	2	0	0	0	1	2	2	2	3	1	14	1	0	1	1	4	4	3	4	4
NoESD	10	1	5	1	5	10	1	10	10	1	10	1	15	1	15	10	100	0	6	1	0	1	1	9	3	3	3	3	3	3	1	3	0	3	3	0	1	2	0	31	2	0	2	2	3	2	2	1	2
NoESD	10	1	5	1	5	10	1	10	10	1	10	1	15	1	15	10	100	0	6	0	0	0	1	7	3	3	3	3	1	0	0	3	3	0	2	0	1	2	0	24	2	0	1	1
NoESD	10	1	5	1	5	10	1	10	10	1	10	1	15	1	15	10	100	0	6	1	1	1	1	10	3	3	1	3	2	3	1	3	0	1	2	1	1	2	0	26	2	0	1	2	3	3	3	1	3
NoESD	10	1	5	1	5	10	1	10	10	1	10	1	15	1	15	10	100	0	6	1	1	1	1	10	1	3	2	3	2	0	2	3	3	3	2	2	2	3	0	31	2	0	2	2	2	1	1	1	1
NoESD	10	1	5	1	5	10	1	10	10	1	10	1	15	1	15	10	100	0	6	1	1	1	1	10	3	3	3	3	3	3	3	3	3	0	3	1	3	3	0	37	2	0	2	1
NoESD	10	1	5	1	5	10	1	10	10	1	10	1	15	1	15	10	100	0	6	0	1	1	1	9	3	3	0	3	0	3	1	3	3	0	1	0	1	0	0	21	2	0	1	1
ESD																				0	0
NoESD	10	1	5	1	5	10	1	10	10	1	10	1	15	1	15	10	100	0	6	1	1	1	1	10	3	3	3	3	2	3	3	3	2	3	2	2	2	3	0	37	2	0	2	2
NoESD	10	1	5	1	5	10	1	10	10	1	10	1	15	1	15	10	100	0	6	1	1	1	1	10	2	2	3	3	3	3	3	3	3	3	3	3	3	2	0	39	2	0	2	2	3	2	3	1	1
NoESD																				0	0
NoESD	10	1	5	1	5	10	1	10	10	1	10	1	15	1	15	10	100	0	6	1	1	1	1	10	2	2	2	3	3	3	3	3	3	3	2	0	2	2	0	33	2	0	2	2	4	3	3	1	1
NoESD	10	1	5	1	5	10	1	10	10	1	10	1	15	1	15	10	100	0	6	1	1	1	1	10	3	3	0	2	3	3	1	3	3	3	1	3	0	0	0	28	2	0	2	2
NoESD	10	1	5	1	5	10	1	10	10	1	10	1	15	1	15	10	100	0	6	1	1	1	1	10	3	2	3	3	2	3	0	0	3	3	0	0	0	2	0	24	2	0	2	1
ESD	10	1	5	1	5	10	1	10	10	1	10	1	15	1	15	10	100	0	6	1	1	1	1	10	1	3	2	3	2	1	3	3	3	3	1	0	0	0	1	26	2	0	2	2	2	1	1	1	2
NoESD	10	1	5	1	5	10	1	10	10	1	10	1	15	1	15	10	100	0	6	1	1	1	1	10	3	3	2	3	2	3	3	3	3	3	0	0	0	2	0	30	2	0	2	1
NoESD	10	1	5	1	5	10	1	10	10	1	10	1	15	1	15	10	100	0	6	1	1	1	1	10	0	2	0	0	2	2	1	3	0	0	3	2	2	3	0	20	2	0	2	2	3	3	3	4	3
NoESD	10	1	5	1	5	10	1	10	10	1	10	1	15	1	15	10	100	0	6	1	1	1	1	10	3	3	0	3	3	3	3	3	3	3	0	2	3	2	2	36	2	0	2	2
ESD	10	1	5	1	5	10	1	10	10	1	10	1	15	1	15	10	100	0	6	0	0	1	1	8	1	0	0	0	0	0	0	3	3	3	0	3	0	0	0	13	2	0	2	2	3	1	1	1	1
NoESD	10	1	5	1	5	10	1	10	10	1	10	1	15	1	15	10	100	0	6	1	1	0	1	9	2	2	3	3	2	3	1	1	0	0	1	1	0	0	0	19	2	0	2	2
NoESD																				0	0
ESD	10	1	5	1	5	10	1	10	10	1	10	1	15	1	15	10	100	0	6	1	1	1	1	10	3	3	3	3	3	3	3	3	3	3	2	3	2	3	0	40	2	0	2	2	3	1	2	1	1
ESD																				0	0
NoESD	10	1	5	1	5	10	1	10	10	1	10	1	15	1	15	10	100	0	6	1	1	1	1	10	3	3	3	3	3	3	0	3	3	3	3	3	3	1	3	40	1	0	2	2
NoESD	10	1	5	1	5	10	1	10	10	1	10	1	15	1	15	10	100	0	6	0	1	1	1	9	3	3	3	3	0	3	1	0	3	3	1	1	1	0	0	25	2	0	1	1
NoESD																				0	0
NoESD																				0	0
NoESD	10	1	5	1	5	10	1	10	10	1	10	1	15	1	15	10	100	0	6	1	1	1	1	10	1	3	1	3	3	3	3	3	3	3	2	1	1	1	2	33	2	0	2	2	3	3	3	4	3
NoESD	10	1	0	0	5	10	1	10	10	1	10	1	15	1	15	10	95	0	5	0	0	0	0	5	0	0	0	0	0	0	1	0		0	1	0	0	0	1	3	1	4	2	2
NoESD	10	1	5	1	5	10	1	10	10	1	10	1	15	1	15	10	100	0	6	1	1	1	1	10	3	3	3	2	3	3	3	3	3	3	1	3	1	3	0	37	2	0	2	2
NoESD	10	1	5	1	5	10	1	10	10	1	10	1	15	1	15	10	100	0	6	1	1	1	1	10	2	3	3	3	2	3	3	3	3	2	2	0	1	2	0	32	2	0	1	1	4	2	2	3	2
ESD	10	1	5	1	5	10	1	10	10	1	10	1	15	1	15	10	100	0	6	1	0	0	1	8	3	3	3	3	3	2	3	0	0	0	2	0	0	0	0	22	2	0	2	2
NoESD																				0	0
NoESD	10	1	5	1	5	10	1	10	10	1	10	1	15	1	15	10	100	0	6	1	1	1	1	10	1	1	0	0	1	2	1	3	3	2	1	2	3	2	2	24	2	0	2	2
NoESD	10	1	5	1	5	10	1	10	10	1	10	1	15	1	15	10	100	0	6	1	1	1	1	10	3	3	2	3	2	3	3	3	3	3	1	3	1	2	0	35	2	0	1	1
NoESD																				0	0
NoESD	10	1	5	1	5	10	1	10	10	1	10	1	15	1	15	10	100	0	6	1	1	1	1	10	3	3	3	3	3	3	3	3	3	3	3	1	2	1	0	37	2	0	2	2	1	1	3	2	2
NoESD	10	1	5	1	5	10	1	10	10	1	10	1	15	1	15	10	100	0	6	1	1	1	1	1	3	3	3	3	3	3	1	3	3	0	1	0	0	0	0	26	2	0	2	2
NoESD	5	1	0	0	5	5	0	10	5	0	10	1	15	1	10	5	70	0	3	0	0	0	0	3	0	0	0	0	0	0	0	0	3	0	1	0	0	0	0	4	2	0	1	1	3	3	4	3	3
NoESD	10	1	5	1	5	10	1	10	10	1	10	1	15	1	15	10	100	0	6	0	0	0	1	7	3	3	3	3	0	3	2	3	3	0	1	0	0	2	0	26	2	0	2	2	2	1	2	1	1
NoESD	10	1	5	1	5	10	1	10	10	1	10	1	15	1	15	10	100	0	6	1	1	1	1	10	3	3	3	3	3	3	3	3	3	0	2	0	2	2	0	33	2	0	2	1
NoESD	10	1	5	1	5	10	1	10	10	1	10	1	15	1	15	10	100	0	6	1	1	1	1	10	3	3	3	3	3	3	3	3	3	3	2	1	2	3	2	40	2	0	2	2	2	1	2	1	1
NoESD	10	1	5	1	5	10	1	10	10	1	10	1	15	1	15	10	100	0	6	1	1	1	1	10	3	3	3	3	3	3	3	3	3	3	3	0	2	3	2	40	2	0	2	2
NoESD	10	1	5	1	5	10	1	10	10	1	10	1	15	1	15	0	90	0	6	1	1	1	1	10	3	3	0	3	3	3	2	3	3	3	1	0	2	0	0	29	2	0	2	2	3	1	2	1	1
ESD																				0	0
NoESD	10	1	5	1	5	10	1	10	10	1	10	1	15	1	15	10	100	0	6	0	0	0	0	6	0	0	0	3	3	2	3	3	0	1	2	0	0	0	0	17	1	4	2	2	4	2	4	3	4
NoESD	10	1	5	1	5	10	1	10	10	1	10	1	15	1	15	10	100	0	6	1	1	1	1	10	3	3	3	3	3	3	3	3	3	3	3	2	2	3	0	40	2	0	2	2	1	1	1	1	1
ESD																				0	0
NoESD																				0	0
NoESD	10	1	5	1	5	10	1	10	10	1	10	1	15	1	15	10	100	0	6	1	1	1	1	10	3	3	3	3	2	3	3	2	3	3	1	2	2	2	2	37	2	0	2	2
NoESD	10	1	0	0	5	10	1	10	10	1	10	1	10	0	10	5	80	0	4	0	0	0	0	4	0	1	0	3	0	0	0	3	3	3	1	0	0	0	0	14	2	0	2	2	1	1	1	1	1
NoESD	10	1	5	1	5	10	1	10	10	1	10	1	15	1	15	10	100	0	6	0	1	1	0	8	0	3	0	3	2	1	2	3	1	3	2	0	1	2	0	23	2	0	2	2	4	3	4	2	1
ESD	10	1	5	1	5	10	1	10	10	1	10	1	15	1	15	10	100	0	6	1	1	1	1	10	0	2	0	0	0	0	0	3	0	3	2	0	0	0	0	10	1	0	2	2	2	1	3	1	3
NoESD	10	1	5	1	5	10	1	10	10	1	10	1	15	1	15	10	100	0	6	1	1	1	1	10	1	1	0	3	2	3	3	3	3	2	2	3	1	3	0	30	2	0	2	2	1	1	1	1	1
NoESD	10	1	5	1	5	10	1	10	10	1	10	1	15	1	15	10	100	0	6	1	1	1	1	10	3	3	3	3	3	3	1	3	3	3	1	0	2	3	0	34	2	0	2	2	3	2	2	1	1
NoESD	10	1	5	1	5	5	0	10	10	1	10	1	15	1	15	10	95	0	5	1	1	1	0	8	0	3	0	0	2	3	3	3	3	3	1	0	1	2	0	24	2	0	2	2	1	1	1	1	1
ESD	10	1	5	1	5	10	1	10	10	1	10	1	15	1	15	10	100	0	6	1	1	1	1	10	3	3	3	3	3	3	3	3	3	3	2	0	1	2	2	37	2	0	2	2
ESD	10	1	5	1	5	10	1	10	10	1	10	1	15	1	15	10	100	0	6	1	1	1	1	10	3	3	3	3	3	3	0	3	2	3	0	0	0	1	0	27	2	0	2	2	2	2	2	2	2
NoESD	10	1	5	1	5	10	1	10	10	1	10	1	15	1	0	10	85	0	6	0	0	0	1	7	2	2	2	1	0	0	0	0	3	0	0	0	0	3	1	14	2	0	1	1
ESD	10	1	0	0	5	10	1	10	5	0	10	1	15	1	15	10	90	0	4	1	1	1	1	8	1	0	0	3	3	0	1	3	3	0	0	0	1	0	0	15	2	0	2	1	3	3	3	3	3
ESD	10	1	5	1	5	10	1	10	10	1	10	1	15	1	15	10	100	0	6	1	1	1	1	10	0	3	2	3	3	3	2	2	3	2	0	1	0	3	0	27	2	0	2	1	3	1	1	1	1
ESD	5	1	5	1	5	5	1	10	10	0	10	1	15	1	15	0	80	0	5	0	0	1	1	7	3	2	0	3	3	3	3	3	3	3	2	1	0	3	0	32	2	0	1	2
NoESD																				0	0
NoESD	10	1	5	1	5	10	1	10	10	1	10	1	15	1	15	10	100	0	6	1	1	1	1	10	3	3	3	3	3	3	3	3	3	3	2	0	1	2	3	38	2	0	2	2
NoESD	10	1	5	1	5	10	1	10	10	1	10	1	15	1	15	10	100	0	6	0	1	1	1	9	2	1	2	2	1	3	0	1	0	3	0	0	0	2	0	17	1	0	2	2
NoESD	10	1	5	1	5	10	1	10	10	1	10	1	15	1	15	10	100	0	6	1	1		1	9	3	2	1	2	1	2	0	0	3	0	0	0	0	3	0	17	1	0	2	2
NoESD																				0	0
ESD	10	1	5	1	5	10	1	10	10	1	10	1	15	1	10	10	95	1	6	0	0	0	1	7	3	3	0	3	0	2	0	3	2	0	0	0	0	3	0	19	2	0	1	1	3	1	2	1	3
ESD																				0	0
NoESD	10	1	5	1	5	10	1	10	10	1	10	1	15	1	15	10	100	0	6	1	1	1	1	10	3	3	3	3	2	3	3	3	3	1	1	3	3	2	2	38	2	0	2	2	3	1	2	2	2
ESD																				0	0
NoESD																				0	0
NoESD	10	1	5	1	5	10	1	10	10	1	10	1	15	1	15	10	100	0	6	1	0	1	1	9	3	3	3	3	2	3	0	3	0	0	0	0	0	3	0	23	2	0	2	2
NoESD	10	1	5	1	5	10	1	10	10	1	10	1	15	1	15	10	100	0	6	0	0	0	1	7	3	3	3	3	0	0	2	2	3	0	1		1	0	1	22	2	0	2	2
NoESD	10	1	5	1	5	10	1	10	5	0	10	1	15	1	15	10	95	0	5	0	1	1	1	8	1	3	2	1	0	3	1	3	3	3	0	0	1	0	0	21	2	0	1	1
ESD	10	1	5	1	5	10	1	10	10	1	10	1	15	1	10	0	85	0	6	1	1	1	1	10	3	3	3	3	2	3	0	3	3	2	1	1	0	3	0	30	2	0	2	2
ESD	10	1	5	1	5	10	1	10	10	1	10	1	15	1	15	10	100	0	6	1	1	1	1	10	3	3	3	3	3	3	3	3	3	3	2	0	0	1	0	33	2	0	2	2	1	1	1	1	1
NoESD	5	1	0	0	5	5	0	10	10	1	10	1	15	1	15	10	85	0	4	0	0	0	0	4																	2	0	1	1	4	4	4	4	3
ESD	10	1	5	1	5	5	1	5	10	1	10	1	15	1	15	10	90	0	6	0	0	1	1	8	1	1	1	1	0	3	1	3	0	0	3	0	2	3	3	22	2	0	1	1	1	3	1	1	2
ESD	10	1	5	1	5	10	1	10	10	1	10	1	15	1	15	10	100	0	6	1	1	1	1	10	3	3	2	3	2	3	2	3	3	1	1	0	0	3	0	29	2	0	2	1	1	1	1	1	1
ESD																				0	0
NoESD																				0	0
NoESD	10	1	5	1	5	10	1	10	10	1	10	1	15	1	15	10	100	0	6	1	0	1	1	9	1	3	0	3	0	0	1	3	0	0	1	0	1	0	0	13	2	0	2	2	3	3	1	3	1
ESD	10	1	5	1	5	10	1	10	10	1	10	1	15	1	15	10	100	0	6	0	1	1	0	8	0	3	0	2	2	3	2	3	3	1	2	0	0	1	0	22	2	0	2	2	1	1	3	1	2
NoESD	10	1	5	1	5	10	1	10	10	1	10	1	15	1	10	10	95	0	6	0	1	1	0	8	0	0	0	2	2	3	0	3	0	3	0	0	0	2	0	15	2	0	2	2	3	3	3	2	3
NoESD																				0	0
NoESD																				0	0
NoESD	10	1	5	1	5	10	1	10	10	1	10	1	15	1	15	10	100	0	6	0	1	0	1	8	3	3	0	2	2	3	3	3	3	0	1	0	1	0	2	26	2	0	2	2	3	2	3	3	1
NoESD	10	1	5	1	5	10	1	10	10	1	10	1	15	1	15	10	100	0	6	1	1	1	1	10	3	2	3	2	3	3	3	3	3	3	3	0	2	0	2	35	2	0	2	2
NoESD	10	1	5	1	5	10	1	10	10	1	10	1	15	1	15	10	100	0	6	1	1	1	1	10	0	3	3	3	2	3	2	3	3	2	2	0	1	3	0	30	2	0	2	2	1	1	1	3	1
NoESD	10	1	0	0	5	10	1	10	10	1	10	1	15	1	15	10	95	0	5	0	0	0	1	6	2	2	2	3	2	0	2	0	3	0	1	0	0	0	0	17	2	0	1	1
ESD	10	1	5	1	5	10	1	10	10	1	10	1	15	1	15	10	100	0	6	1	1	1	1	10	2	3	0	3	2	3	3	3	3	3	1	2	3	3	2	36	2	0	2	2	2	1	2	1	1
NoESD	10	1	5	1	5	10	1	10	10	1	10	1	15	1	15	10	100	0	6	0	0	1	0	7	0	2	0	2	0	3	2	3	0	3	0	0	0	0	0	15	2	0	2	2	3	2	2	3	2
NoESD	10	1	5	1	5	10	1	10	10	1	10	1	15	1	15	10	100	0	6	1	1	1	1	10	3	3	0	3	3	3	3	3	3	3	0	0	0	3	2	32	1	0	2	2
ESD	10	1	5	1	5	5	1	10	10	1	10	1	15	1	15	10	95	0	6	1	1	1	1	10	1	3	0	3	3	3	3	3	3	3	2	1	1	3	0	32	2	0	2	2	3	1	1	2	1
NoESD	10	1	5	1	5	10	1	10	10	1	10	1	15	1	15	10	100	0	6	1	0	0	0	7	0	3	3	3	3	2	0	3	0	3	0	0	0	0	0	20	2	0	2	2	3	4	4	3	3
NoESD	10	1	0	0	0	0	0	10	10	1	5	0	5	0	0	0	40	1	2	0	0	0	0	2	3	3	0	0	0	0	0	0	2	0	0	0	0	3	0	11	2	0	1	1
NoESD	5	1	5	1	5	10	1	10	10	1	10	1	15	1	15	5	90	0	6	0	1	1	1	9	3	3	3	3	2	3	2	3	3	3	0	0	0	3	0	31	2	0	2	2
NoESD	10	1	5	1	5	10	1	10	5	0	10	1	15	1	15	10	95	0	5	1	1	1	1	9	3	1	2	0	2	3	0	3	3	2	0	0	2	0	0	21	2	0	2	2
NoESD	10	1	5	1	5	10	1	10	10	1	10	1	15	1	15	10	100	0	6	1	1	1	1	10	2	3	0	3	2	3	2	3	2	0	1	2	2	2	2	29	2	0	2	2
NoESD
NoESD	10	1	5	1	5	10	1	10	10	1	10	1	15	1	15	10	100	0	6	1	1	1	1	10	3	3	3	3	2	2	3	3	3	3	0	0	2	1	1	32	2	0	2	2
NoESD	10	1	5	1	5	10	1	10	10	1	10	1	15	1	10	10	95	0	6	1	0	0	1	8	3	3	2	2	3	2	2	3	0	0	0	0	0	1	0	21	2	0	2	1	2	2	3	2	3
NoESD	10	1	5	1	5	10	1	10	10	1	10	1	15	1	10	5	90	0	6	0	0	0	1	7	3	3	3	3	0	0	0	3	3	0	0	0	0	3	0	21	2	0	1	1	3	1	2	1	3
NoESD
NoESD	10	1	5	1	5	10	1	10	10	1	10	1	15	1	15	10	100	0	6	0	0	0	0	6	0	3	2	0	0	2	0	2	3	0	3	0	2	1	0	18	2	0	2	2	2	2	3	2	3
NoESD	10	1	5	1	5	10	1	10	10	1	10	1	15	1	15	10	100	0	6	1	1	1	1	10	2	2	3	3	3	3	3	3	3	0	1	0	2	3	0	31	2	0	2	2
NoESD	10	1	5	1	5	10	1	10	10	1	10	1	15	1	10	10	95	0	6	0	0	0	1	7	3	3	3	1	0	0	2	0	3	0	0	0	1	0	0	16	2	0	2	2
ESD	10	1	5	1	5	10	1	10	10	1	10	1	15	1	15	10	100	0	6	0	0	1	0	7	0	2	0	1	0	2	0	3	0	2	1	0	0	0	0	11	2	0	1	1
NoESD
NoESD	10	1	5	1	5	10	1	10	10	1	10	1	15	1	15	10	100	0	6	1	1	1	1	10	2	2	2	3	3	3	2	3	1	2	2	0	2	0	1	28	2	0	1	1
NoESD	10	1	5	1	5	10	1	10	10	1	10	1	15	1	15	10	100	0	6	1	1	1	1	10	3	2	3	2	2	2	3	3	3	3	2	3	3	3	3	40	2	0	2	2
ESD	10	1	5	1	5	10	1	10	10	1	10	1	15	1	15	10	100	0	6	0	0	0	1	7	3	3	2	3	0	3	1	3	0	0	2	0	0	3	0	23	2	0	2	1
NoESD
NoESD	10	1	5	1	5	10	1	10	10	1	10	1	15	1	15	10	100	0	6	1	1	1	1	10	1	3	1	2	2	3	3	3	3	3	1	0	0	1	0	26	2	0	2	2
NoESD	10	1	5	1	5	10	1	10	10	1	10	1	15	1	15	10	100	0	6	0	1	1	1	9	3	3	0	3	2	3	3		3	3	1	0	1	0	0	25	2	0	2	1
NoESD	10	1	5	1	5	10	1	10	10	1	10	1	15	1	15	10	100	0	6	1	1	1	1	10	3	2	3	3	3	3	3	3	3	0	3	0	0	3	0	32	2	0	2	2
NoESD	10	1	5	1	5	10	1	10	10	1	10	1	15	1	15	10	100	0	6	1	1	1	1	10	2	3	2	2	2	2	2	2	0	3	0	0	0	2	0	22	2	0	1	2
NoESD	10	1	5	1	5	10	1	10	10	1	10	1	15	1	15	10	100	0	6	1	1	1	1	10	2	3	3	3	3	3	3	3	3	3	3	0	0	3	0	35	2	0	2	2
ESD	10	1	5	1	5	10	1	10	10	1	10	1	15	1	15	10	100	0	6	1	1	1	1	10	0	1	3	2	2	2	2	3	3	0	2	2	3	2	0	27	2	0	2	2
NoESD	10	1	5	1	5	10	1	10	10	1	10	1	15	1	15	10	100	0	6	1	1	1	1	10	3	3	2	3	2	3	1	3	1	3	1	1	1	1	2	30	2	0	2	2
NoESD	10	1	5	1	5	10	1	10	10	1	10	1	15	1	15	10	100	0	6	1	1	1	1	10	3	3	2	3	2	3	3	3	3	1	2	0	2	2	2	34	2	0	2	2
NoESD	10	1	5	1	5	5	1	10	10	1	10	1	15	1	15	10	95	0	6	0	1	0	1	8	3	3	2	2	0	3	0	3	3	0	0	0	0	3	0	22	2	0	1	1
NoESD	10	1	5	1	5	10	1	10	10	1	10	1	15	1	10	0	85	0	6	0	0	0	1	7	3	3	3	3	0	0	2	0	0	0	2	0	0	0	0	16	2	0	2	1	3	1	4	3	3
NoESD	10	1	5	1	5	5	0	10	5	0	10	1	15	1	15	10	90	0	4	0	0	0	1	5	2	3	3	3	0	0	0	0	3	0	0	0	0	2	0	16	2	0	1	1
NoESD	10	1	5	1	5	10	1	10	10	1	10	1	15	1	15	10	100	0	6	1	1	1	1	10	1	3	3	2	2	3	3	2	3	3	1	2	2	2	2	34	2	0	2	2
NoESD	10	1	5	1	5	10	1	10	10	1	10	1	15	1	15	10	100	0	6	1	1	1	1	10	0	2	0	0	0	3	2	3	3	3	0	0	0	0	0	16	2	0	2	2	1	1	2	1	1
ESD	10	1	5	1	5	10	1	10	10	1	10	1	15	1	15	10	100	0	6	0	1	0	1	8	1	1	3	0	0	2	2	3	0	0	3	0	1	3	2	21	2	0	2	2
ESD	5	1	5	1	5	5	1	10	10	1	10	1	15	1	15	10	90	0	6	0	0	0	1	7	1	2	2	3	1	1	2	3	2	1	2	2	0	2	3	27	2	0	2	2
ESD
ESD
ESD	10	1	0	0	5	10	1	10	10	1	10	1	15	1	15	10	95	0	5	0	1	1	0	7	0	0	0	0	0	3	2	2	3	3	1	0	0	0	0	14	2	0	2	1	3	3	3	3	3
NoESD	10	1	5	1	5	10	1	10	10	1	10	1	15	1	15	10	100	0	6	1	0		1	8	3	2	1	3	1	1	1	3	0	0	2	3	3	0	3	26	2	0	2	2
NoESD	10	1	5	1	5	10	1	10	10	1	10	1	15	1	15	5	95	0	6	0	0	0	1	7																	2	0	2	2	3	3	1	1	4
ESD
NoESD	10	1	5	1	5	10	1	10	10	1	10	1	15	1	15	10	100	0	6	1	1	1	1	10	3	3	3	3	3	3	3	0	0	0	2	0	0	1	1	25	2	0	2	2
NoESD	10	1	0	0	5	10	1	10	0	1	10	1	15	1	10	10	80	0	5	0	1	1	1	8	3	3	0	3	0	3	0	3	0	2	1	0	0	0	0	18	2	0	1	1
ESD	10	1	5	1	5	10	1	10	10	1	10	1	15	1	15	10	100	0	6	0	1	0	0	7	0	3	0	2	1	2	0	3	0	0	0	0	0	2	0	13	2	0	1	1
NoESD	10	1	5	1	5	10	1	10	10	1	10	1	15	1	15	10	100	0	6	1	0	0	1	8	3	3	2	3	2	0	2	3	3	0	1	2	1	0	0	25	2	0	2	1
NoESD	10	1	5	1	5	10	1	10	10	1	10	1	15	1	15	10	100	0	6	1	1	1	1	10	2	3	3	3	3	3	3	3	3	0	2	3	3	2	0	36	2	0	2	2	1	1	2	1	1
NoESD	10	1	5	1	5	10	1	10	10	1	10	1	15	1	15	10	100	0	6	1	1	1	1	10	3	3	0	3	0	3	0	3	0	3	2	0	0	3	0	23	2	0	2	2	1	1	2	3	3
[truncated: 35 more columns]

## Sheet: 12 months
KOD	BImat12m	Katzmat12	BIbad12	Katzbad12	BIperstoa12	BIpåav12	Katzpåav12	BItarm12	BIblåsa12	Katzkont12	BItoa12	Katztoa12	BIssförf12	Katzförf12	BIförf12	BItrapp12	Barthel12	Katzpers12	Katzstäd12	Katzuppk12	Katztransp12	Katzmatlag12	Katztot12	ändringbo12	boende	flyttat_SÄBO	hemtj12	gång	gång_diko	FAImat12	FAIdisk12	FAItvätt12	FAIlätthush12	FAItungh12	FAIhandl12	FAIsoc12	FAIprom12	FAIhobby12	FAIkomm12	FAIutflykt12	FAIträdgård12	FAIhush12	FAIböcker12	FAIförv12	FAItot12m
NoESD	10	1	5	1	5	10	1	10	10	1	10	1	15	1	15	10	100	6	0	1	1	1	9	2		2	2	3	0	2	2	0	3	0	2	1	2	3	0	2	1	2	3	0	23
NoESD	10	1	5	1	5	10	1	10	10	1	10	1	15	1	15	10	100	6	1	1	1	1	10	2		2	2	3	0	3	3	3	3	3	3	2	3	3	3	2	2	2	3	0	38
NoESD	10	1	5	1	5	10	1	10	10	1	10	1	15	1	15	10	100	6	1	1	1	1	10	2		2	2	3	0	3	3	0	1	0	3	2	3	3	3	0	2	3	3	0	29
ESD
ESD	10	1	5	1	5	10	1	10	10	1	10	1	15	1	15	10	100	6	1	1	1	1	10	2		2	2	3	0	2	3	2	3	2	3	3	3	0	3	3	0	2	2	0	31
NoESD	10	1	5	1	5	10	1	10	10	1	10	1	15	1	15	10	100	6	1	1	1	1	10	2		2	2	3	0	3	3	3	3	3	3	3	3	3	3	3	0	2	3	0	38
NoESD	10	1	5	1	5	10	1	10	10	1	10	1	15	1	15	10	100	6	1	1	1	1	10	2		2	2	3	0	3	3	3	3	3	3	3	3	3	3	3	0	2	1	1	37
ESD
ESD
ESD	5	1	5	1	5	10	1	5	5	0	10	1	15	1	10	5	75	5	0	0	0	0	5	1	3		2	2	0	0	1	0	0	0	2	0	3	2	1	1	0	0	3	0	13
NoESD	10	1	5	1	5	10	1	10	10	1	10	1	15	1	15	10	100	6	1	1	1	1	10	2		2	2	3	0	3	3	3	3	3	3	3	3	3	0	0	0	0	2	0	29
NoESD	10	1	5	1	5	10	1	10	10	1	10	1	15	1	15	10	100	6	0	0	1	1	8	2		2	1	3	0	3	3	3	3	0	3	3	3	3	3	2	0	0	2	0	31
NoESD	10	1	5	1	5	10	1	10	10	1	10	1	15	1	15	10	100	6	1	1	1	1	10	2		2	1	3	0	2	3	0	3	1	3	1	0	0	1	0	1	0	1	0	16
NoESD	10	1	5	1	5	10	1	10	10	1	10	1	15	1	15	10	100	6	1	1	1	1	10	2		2	2	3	0	1	3	2	3	3	2	2	3	3	3	2	2	2	3	0	34
NoESD	10	1	5	1	5	10	1	10	10	1	10	1	15	1	15	10	100	6	1	1	1	1	10	2		2	2	3	0	3	3	3	3	3	3	3	3	3	0	2	3	3	2	0	37
NoESD	10	1	0	0	5	10	1	10	10	1	10	1	15	1	15	10	95	5	0	0	0	1	6	2		2	1	3	0	3	3	0	3	0	3	0	3	0	0	1	0	0	0	0	16
ESD
NoESD	10	1	5	1	5	10	1	10	10	1	10	1	15	1	15	10	100	6	1	1	1	1	10	1	2	2	2	3	0	3	3	3	3	3	3	3	3	3	3	2	0	2	3	2	39
NoESD	10	1	5	1	5	10	1	10	10	1	10	1	15	1	15	10	100	6	1	1	1	1	10	2		2	2	3	0	2	2	2	3	3	3	3	3	3	3	2	3	3	2	2	39
NoESD
NoESD	10	1	5	1	5	10	1	10	10	1	10	1	15	1	15	10	100	6	1	1	1	1	10	2		2	2	3	0	1	2	1	3	1	3	3	3	3	2	2	0	1	2	0	27
NoESD	10	1	5	1	5	10	1	10	10	1	10	1	15	1	15	10	100	6	0	1	1	1	9	2		2	1	3	0	2	3	0	3	2	3	1	3	3	3	2	2	0	2	0	29
NoESD	10	1	5	1	5	10	1	10	5	0	10	1	15	1	15	10	95	5	1	0	0	1	7	2		2	2	3	0	3	2	3	3	2	3	2	0	3	0	0	0	0	2	0	23
ESD	10	1	5	1	5	10	1	10	10	1	10	1	15	1	15	10	100	6	1	1	1	1	10	2		2	2	3	0	2	3	3	3	3	3	3	0	0	1	1	0	0	0	1	23
NoESD	10	1	5	1	5	10	1	10	10	1	10	1	15	1	15	10	100	6	1	1	1	1	10	2		2	2	3	0	3	3	3	3	2	3	3	3	3	3	1	2	0	2	0	34
NoESD	10	1	5	1	5	10	1	10	10	1	10	1	15	1	15	10	100	6	1	0	1	0	8	2		2	2	3	0	0	3	0	0	0	0	2	3	0	3	1	3	2	3	0	20
NoESD	10	1	5	1	5	10	1	10	10	1	10	1	15	1	15	10	100	6	1	1	1	1	10	2		2	2	3	0	2	3	0	3	3	3	2	1	3	3	2	3	3	2	2	35
ESD	10	1	5	1	5	10	1	10	10	1	10	1	15	1	10	10	95	6	1	1	1	1	10	2		2	1	3	0	2	0	0	0	0	3	2	0	3	3	1	3	0	0	0	17
NoESD
NoESD
ESD
ESD
NoESD	10	1	5	1	5	10	1	10	10	1	10	1	15	1	15	10	100	6	1	1	1	1	10	1	1	2	2	3	0	2	3	1	2	2	3	2	1	3	3	2	3	2	1	1	31
NoESD
NoESD
NoESD
NoESD	10	1	5	1	5	10	1	10	10	1	10	1	15	1	15	10	100	6	1	1	1	1	10	2		2	2	3	0	2	3	0	3	3	3	3	3	3	3	3	3	2	0	2	36
NoESD	10	1	5	1	5	10	1	10	10	1	10	1	15	1	15	10	100	6	0	1	1	0	8	2	4	1	1	3	0	0	2	2	0	0	3	0	2		2	0	0	0	0	0	11
NoESD	10	1	5	1	5	10	1	10	10	1	10	1	15	1	15	10	100	6	1	1	1	1	10	2		2	2	3	0	3	2	3	2	2	3	1	3	3	3	2	3	2	2	0	34
NoESD	10	1	5	1	5	10	1	10	10	1	10	1	15	1	15	10	100	6	0	1	1	1	9	2		2	1	3	0	2	3	3	3	2	3	2	3	3	0	3	0	1	2	0	30
ESD	0	0	0	0	0	0	0	0	0	0	0	0	0	0	0	0	0	0	0	0	0	0	0	1	4	1	2	0	1	0	0	0	0	0	0	0	0	0	0	0	0	0	0	0	0
NoESD
NoESD	10	1	5	1	5	10	1	10	10	1	10	1	15	1	15	10	100	6	1	1	1	1	10	2		2	2	3	0	3	2	0	2	0	3	2	3	3	3	0	2	3	0	2	28
NoESD	10	1	5	1	5	10	1	10	10	1	10	1	15	1	15	10	100	6	1	1	1	1	10	2		2	2	3	0	3	2	2	3	2	3	3	3	3	3	2	3	1	0	0	33
NoESD
NoESD	10	1	5	1	5	10	1	10	10	1	10	1	15	1	15	10	100	6	1	1	1	1	10	2		2	2	3	0	3	3	3	3	3	3	3	3	3	0	2	1	2	0	0	32
NoESD	10	1	5	1	5	10	1	10	10	1	10	1	15	1	15	10	100	6	1	1	1	1	10	2		2	2	3	0	3	3	2	3	3	3	2	3	3	3	2	0	0	3	0	33
NoESD	10	1	0	0	5	5	0	0	0	0	0	0	15	1	10	0	45	2	0	0	0	0	2	2		2	1	1	1	0	0	0	0	0	0	3	0	0	0	0	0	0	0	0	3
NoESD	10	1	5	1	5	10	1	10	10	1	10	1	15	1	10	5	90	6	0	0	0	1	7	2		2	2	2	0	3	3	0	3	0	0	0	0	1	0	0	0	0	2	0	12
NoESD	10	1	5	1	5	10	1	10	10	1	10	1	15	1	15	10	100	6	1	0	1	1	9	2		2	2	3	0	3	3	3	3	3	0	3	3	3	0	1	0	0	0	0	25
NoESD	10	1	5	1	5	10	1	0	10	0	10	1	15	1	15	10	90	5	1	1	1	1	9	2		2	2	3	0	3	3	3	3	3	3	3	3	3	2	3	2	2	3	3	42
NoESD	10	1	5	1	5	10	1	10	10	1	10	1	15	1	15	10	100	6	1	1	1	1	10	2		2	2	3	0	3	3	3	3	3	3	3	3	3	3	3	0	2	3	1	39
NoESD	10	1	5	1	5	10	1	10	10	1	10	1	15	1	15	0	90	6	0	1	0	1	8	2		2	2	3	0	3	0	0	3	2	3	0	3	3	3	1	0	0	0	0	21
ESD
NoESD	10	1	0	0	0	5	0	5	5	0	5	0	10	0	15	10	65	1	0	0	0	0	1	1	4	1	2	2	0	0	0	0	0	0	0	3	3	0	0	0	0	0	0	0	6
NoESD
ESD
NoESD
NoESD	10	1	5	1	5	10	1	10	10	1	10	1	15	1	15	10	100	6	1	1	1	1	10	2		2	2	3	0	2	3	3	3	3	3	3	3	3	3	3	3	3	3	2	43
NoESD	0	0	0	0	0	0	0	0	0	0	0	0	0	0	0	0	0	0	0	0	0	0	0					0	1
NoESD	10	1	5	1	5	10	1	10	10	1	10	1	15	1	15	10	100	6	0	1	1	0	8	2		2	2	3	0	0	2	0	3	0	3	2	3	2	3	2	0	1	2	0	23
ESD	10	1	0	0	5	5	0	10	10	1	10	1	15	1	15	10	90	4	0	0	1	0	5	2		2	2	3	0	0	1	0	0	0	0	2	3	0	3	3	0	1	0	0	13
NoESD	10	1	5	1	5	10	1	10	10	1	10	1	15	1	15	10	100	6	1	1	1	1	10	2		2	2	3	0	1	2	0	3	3	3	3	3	3	3	3	3	3	3	0	36
NoESD	10	1	5	1	5	10	1	10	10	1	10	1	15	1	15	10	100	6	1	1	1	1	10	2		2	2	3	0	3	3	3	3	3	3	1	3	3	3	2	0	1	3	0	34
NoESD	10	1	5	1	5	5	0	10	10	1	10	1	15	1	15	10	95	5	1	1	1	0	8	2		2	2	3	0	0	1	0	2	2	1	3	3	3	3	2	0	0	0	0	20
ESD	10	1	5	1	5	10	1	10	10	1	10	1	15	1	15	10	100	6	1	1	1	1	10	1	2	2	2	3	0	3	3	3	3	3	3	3	3	3	3	3		3	2	3	41
ESD	10	1	5	1	5	10	1	10	10	1	10	1	15	1	15	10	100	6	1	1	1	1	10	2		2	2	3	0	3	3	2	3	3	3	3	3	0	3	1	1	0	3	0	31
NoESD	10	1	5	1	5	10	1	10	10	1	10	1	15	1	15	10	100	6	0	0	0	0	6	1		2	1	3	0	1	3	2	3	0	0	1	0	3	0	2	0	0	0	0	15
ESD
ESD	10	1	5	1	5	10	1	10	10	1	10	1	15	1	15	10	100	6	1	1	1	1	10	2		2	2	3	0	0	3	0	3	2	3	2	2	3	3	1	2	0	3	0	27
ESD	10	1	5	1	5	10	1	10	10	1	10	1	15	1	15	10	100	6	0	1	1	1	9	2		2	1	3	0	3	3	3	3	1	3	3	3	3	3	2	0	0	2	0	32
NoESD
NoESD	10	1	5	1	5	10	1	10	10	1	10	1	15	1	15	10	100	6	1	1	1	1	10	2		2	2	3	0	3	3	3	3	3	3	3	3	3	3	2	3	3	3	3	44
NoESD	10	1	5	1	5	10	1	5	10	0	10	1	15	1	15	10	95	5	0	1	1	1	8	2		2	1	3	0	3	0	3	3	0	3	0	0	0	3	0	0	0	2	0	17
NoESD	10	1	5	1	5	10	1	10	10	1	10	1	15	1	15	10	100	6	1	1	1	1	10	2		2	2	2	0	3	3	2	3	2	3	2	0	3	0	0	0	0	3	0	24
NoESD
ESD	10	1	5	1	5	10	1	10	10	1	10	1	15	1	15	10	100	6	0	0	1	1	8	2		2	1	3	0	3	3	3	3	0	0	0	3	3	0	0	1	0	2	0	21
ESD
NoESD	10	1	5	1	5	10	1	10	10	1	10	1	15	1	15	10	100	6	1	1	1	1	10	2		2	2	3	0	3	3	3	3	3	3	2	3	3	3	2	3	3	1	3	41
ESD	10	1	5	1	5	10	1	10	10	1	10	1	15	1	15	10	100	6	1	1	1	1	10	2		2	2	3	0	3	3	3	2	2	3	3	3	3	3	1	0	1	1	0	31
NoESD
NoESD	10	1	5	1	5	10	1	10	10	1	10	1	15	1	15	10	100	6	1	1	1	1	10	2		2	2	3	0	3	3	3	3	3	3	0	3	0	0	2	0	0	0	0	23
NoESD	10	1	0	0	5	10	1	10	10	1	10	1	15	1	10	5	85	5	0	0	0	0	5	1	2	2	2	2	0	0	0	0	0	0	0	0	0	0	0	0	0	0	2	0	2
NoESD	10	1	5	1	5	10	1	10	10	1	10	1	15	1	15	0	90	6	0	1	1	1	9	2		2	1	3	0	1	3	2	2	0	3	0	3	3	3	0	0	1	0	0	21
ESD	10	1	5	1	5	10	1	10	10	1	10	1	15	1	15	10	100	6	1	1	1	1	10	2		2	2	3	0	3	3	3	3	3	3	3	3	3	3	0	0	0	3	0	33
ESD	10	1	5	1	5	10	1	10	10	1	10	1	15	1	15	10	100	6	1	1	1	1	10	2		2	2	3	0	3	3	2	3	2	3	3	3	3	2	3	0	0	1	0	31
NoESD	5	1	0	0	5	5	0	10	10	1	10	1	15	1	15	5	80	4	0	0	0	0	4	1	5	2	1	3	0	0	0	0	0	0	0	3	3	0	3	0	0	0	0	0	9
ESD	10	1	0	0	5	0	0	10	10	1	10	1	15	1	15	5	80	4	0	0	1	1	6	1	2	2	2	3	0	1	2	0	3	0	3	2	3	0	1	1	0	0	0	0	16
ESD	10	1	5	1	5	10	1	10	10	1	10	1	15	1	15	10	100	6	1	1	1	1	10	2		2	2	3	0	3	3	3	3	3	3	3	3	3	3	1	0	0	3	0	34
ESD
NoESD
NoESD	10	1	5	1	5	10	1	10	10	1	10	1	15	1	15	10	100	6	1	0	1	1	9	2		2	2	3	0	2	3	0	3	3	0	0	3	0	3	0	0	2	0	0	19
ESD	10	1	5	1	5	10	1	10	10	1	10	1	15	1	15	10	100	6	1	1	1	0	9	2		2	2	3	0	0	3	0	3	2	3	2	3	3	3	2	1	1	1	0	27
NoESD	0	0	0	0	0	0	0	0	0	0	0	0	0	0	0	0	0	0	0	0	0	0	0	1	4	1	2	0	1	0	0	0	0	0	0	0	0	0	0	0	0	0	0	0	0
NoESD
NoESD	5	1	0	0	5	10	1	10	5	0	10	1	15	1	10	5	75	4	0	0	0	0	4	2		2	2	2	0	0	0	0	0	0	0	2	0	3	0	1	0	0	0	0	6
NoESD	10	1	5	1	5	10	1	10	10	1	10	1	15	1	15	10	100	6	1	1	1	1	10	2		2	2	3	0	3	3	0	3	3	3	3	3	0	3	2	0	0	0	2	28
NoESD
NoESD	10	1	5	1	5	10	1	10	10	1	10	1	15	1	15	10	100	6	1	1	1	1	10	2		2	2	3	0	0	3	3	3	3	3	2	3	3	3	2	0	2	3	0	33
NoESD
ESD	10	1	5	1	5	10	1	10	10	1	10	1	15	1	15	10	100	6	1	1	1	1	10	2		2	2	3	0	1	1	0	0	1	1	3	3	3	3	3	0	1	3	3	26
NoESD
NoESD
ESD	10	1	5	1	5	5	1	10	10	1	10	1	15	1	15	10	95	6	1	1	1	1	10	2		2	2	3	0	0	3	0	2	0	3	3	3	3	3	1	2	2	3	0	28
NoESD	10	1	5	1	5	5	0	10	10	1	10	1	15	1	10	5	85	5	0	0	0	0	5	2		2	2			0	2	0	3	0	0	2	0	0	0	0	0	0	0	0	7
NoESD
NoESD	10	1	5	1	5	10	1	10	10	1	10	1	15	1	10	10	95	6	0	1	0	1	8	2		2	1	3	0		3	3	3		3	3	1	3	1	2	0	0	2	0	24
NoESD
NoESD	10	1	5	1	5	10	1	10	10	1	10	1	15	1	15	10	100	6	1	1	1	1	10	2		2	2	3	0	3	3	0	3	2	3	2	3	3	3	2	3	3	3	0	36
NoESD
NoESD	10	1	5	1	5	10	1	10	10	1	10	1	15	1	15	10	100	6	1	1	1	1	10	2		2	2	3	0	3	3	3	3	3	2	3	2	3	3	2	0	2	2	3	37
NoESD	10	1	5	1	5	5	1	10	10	1	10	1	15	1	10	5	85	6	0	1	0	1	8	2		2	2	3	0	3	3	2	3	2	3	2	3	0	1	1	0	0	0	0	23
NoESD	10	1	5	1	5	10	1	10	10	1	10	1	15	1	15	10	100	6	0	1	0	1	8	1	3	2	1	2	0	3	3	3	3	0	3	3	3	3	0	1	1	0	3	0	29
NoESD
NoESD	10	1	5	1	5	10	1	10	10	1	10	1	15	1	15	10	100	6	0	0	0	0	6	2		2	2	3	0	0	3	3	0	0	0	0	3	3	0	0	1	1	0	0	14
NoESD	10	1	5	1	5	10	1	10	10	1	10	1	15	1	15	10	100	6	1	1	1	1	10	2		2	2	3	0	3	3	3	3	3	3	3	1	3	3	1	0	0	3	0	32
NoESD	10	1	5	1	5	10	1	10	10	1	10	1	15	1	15	10	100	6	0	0	0	1	7	2		2	1	3	0	3	3	3	3	0	3	3	0	3	0	2	0	0	0	0	23
ESD	10	1	5	1	5	10	1	10	10	1	10	1	15	1	15	10	100	6	0	1	1	1	9	2		2	1	3	0	3	3	0	0	0	3	0	0	0	0	0	0	0	3	0	12
NoESD
NoESD	10	1	5	1	5	10	1	10	5	1	10	1	15	1	15	10	95	6	1	1	1	1	10	2		2	2	3	0	3	3	3	3	2	3	3	3	0	3	1	0	1	0	0	28
NoESD	10	1	5	1	5	10	1	10	10	1	10	1	15	1	15	10	100	6	1	1	1	1	10	2		2	2	3	0	3	3	3	3	3	3	2	3	3	3	3	3	3	2	3	43
ESD	10	1	5	1	5	10	1	10	10	1	10	1	15	1	15	10	100	6	0	1	0	1	8	2		2	2	2	0	3	3	2	3	0	2	0	3	3	3	0	0	0	2	0	24
NoESD	10	1	5	1	5	10	1	10	10	1	10	1	15	1	15	10	100	6	1	1	1	1	10	2		2	2	3	0	3	3	2	2	1	3	0	3	2	3	0	0	2	0	0	24
NoESD	10	1	5	1	5	10	1	10	10	1	10	1	15	1	15	10	100	6	1	1	1	1	10	2		2	2	3	0	3	3	3	3	3	3	2	3	3	3	0	0	3	1	0	33
NoESD	10	1	5	1	5	10	1	10	10	1	10	1	15	1	15	10	100	6	0	1	1	1	9	1	2	2	1	3	0	3	2	1	3	2	3	3	3	3	3	1	0	1	0	0	28
NoESD	10	1	5	1	5	10	1	10	10	1	10	1	15	1	15	10	100	6	1	1	1	1	10	2		2	2	3	0	3	3	3	3	2	3	3	2	3	3	1	0	0	2	0	31
NoESD
NoESD	10	1	5	1	5	10	1	10	10	1	10	1	15	1	15	10	100	6	1	1	1	1	10	2		2	2	3	0	3	3	3	3	3	3	3	3	3	0	3	0	0	2	2	34
ESD	10	1	5	1	5	10	1	10	10	1	10	1	15	1	15	10	100	6	1	1	1	1	10	2		2	2	3	0	3	3	3	3	3	3	3	3	1	3	2	0	0	3	0	33
NoESD	10	1	5	1	5	10	1	10	10	1	10	1	15	1	15	10	100	6	1	1	1	1	10	2		2	2	3	0	3	3	3	3	3	3	2	1	1	3	1	2	3	1	0	32
NoESD	10	1	5	1	5	10	1	10	10	1	10	1	15	1	15	10	100	6	1	1	1	1	10	2		2	2	3	0	2	3	2	3	2	3	3	2	3	3	2	0	0	0	2	30
NoESD	10	1	5	1	5	10	1	10	10	1	10	1	15	1	15	10	100	6	0	1	0	1	8	2		2	1	2	0	3	3	2	2	0	3	0	3	3	0	0	0	0	2	0	21
NoESD	10	1	5	1	5	10	1	10	10	1	10	1	15	1	5	0	80	6	0	0	0	1	7	2		2	1	2	0	2	0	0	0	0	0	2	0	3	0	1	0	0	0	0	8
NoESD	10	1	5	1	5	5	0	10	5	0	10	1	15	1	15	5	85	4	0	0	0	0	4	2		2	1	3	0	1	3	3	2	0	0	0	1	0	0	0	0	0	2	0	12
NoESD	10	1	5	1	5	10	1	10	10	1	10	1	15	1	15	10	100	6	1	1	1	1	10	2		2	2	3	0	3	3	3	3	3	3	2	1	2	3	2	3	2	2	0	35
NoESD	10	1	5	1	5	10	1	10	10	1	10	1	15	1	15	10	100	6	1	1	1	0	9	2		2	2	3	0	0	3	0	2	0	2	2	3	3	3	2	2	2	0	3	27
ESD	10	1	5	1	5	10	1	10	10	1	10	1	15	1	15	10	100	6	1	1	1	1	10	2		2	2	3	0	3	3	3	2	2	3	3	3	3	3	1	0	0	2	0	31
ESD	10	1	5	1	5	10	1	10	10	1	10	1	15	1	15	10	100	6	1	0	1	1	9	2		2	2	3	0	2	3	3	3	3	2	3	3	3	3	2	1	1	0	0	32
ESD
ESD
ESD	5	1	0	0	5	5	0	10	10	1	10	1	15	1	10	10	80	4	0	0	1	0	5	2		2	2	3	0	0	1	0	0	0	0	2	3	3	3	3	0	0	0	0	15
NoESD	10	1	5	1	5	10	1	10	10	1	10	1	15	1	15	10	100	6	1	1	1	1	10	2		2	1	3	0	3	3	3	3	3	3	3	3	2	3	2	2	2	1	1	37
NoESD	10	1	5	1	5	10	1	10	10	1	10	1	15	1	15	10	100	6	0	1	1	0	8	2		2	2	3	0	2	2	3	3	0	3	3	3	3	3	1	0	0	2	0	28
ESD
NoESD	10	1	5	1	5	10	1	10	10	1	10	1	15	1	15	10	100	6	1	1	1	1	10	2		2	2	3	0	3	3	3	3	3	3	3	3	0	3	2	0	0	0	2	31
NoESD
ESD	10	1	5	1	5	10	1	10	10	1	10	1	15	1	10	0	85	6	0	1	0	0	7	2		2	1			0	3	3	0	0	3	0	3	0	0	0	0	0	2	0	14
NoESD	10	1	5	1	5	10	1	10	10	1	10	1	15	1	15	10	100	6	1	0	0	0	7	2		2	2	3	0	2	3	3	3	3	3	0	3	3	0	0	2	2	0	0	27
NoESD	10	1	5	1	5	10	1	10	10	1	10	1	15	1	15	10	100	6	1	1	1	1	10	2		2	2	3	0	0	3	3	0	3	3	2	3	3	3	3	3	3	1	0	33
NoESD	245

## Sheet: 12 months CGB
KOD	CGBS121	CGBS122	CGBS1212	CGBS124	CGBS125	CGBS126	CGBS127	CGBS128	CGBS129	CGBS1210	CGBS1211	CGBS1212	CGBS12112	CGBS1214	CGBS1215	CGBS1216	CGBS1217	CGBS1218	CGBS1219	CGBS1220	CGBS1221	CGBS1222	general strain_sum	isolation	disappointment	emotional involv	environment	general strain_mean	isolation_mean	disappointment_mean	emotional involv_mean	environment_mean	CGBSmean	CGBSsum_ny	sumCG12	anhörig_age	anhörig_sex	anhörig_relation
NoESD	4	2	3	3	3	3	2	3	2	3	3	3	2	2	2	3	2	1	3	1	3	2	23	8	9	9	6	2.875	2.66667	1.8	3	2	2.5	55	55	66	2	1
NoESD	2	1	2	2	2	3	2	2	1	3	2	1	1	1	1	1	2	1	2	2	2	1	16	4	7	6	4	2	1.33333	1.4	2	1.33333	1.68182	37	37
NoESD	3	1	2	3	3	1	3	1	1	3	2	2	1	1	1	1	1	1	1	3	3	1	19	4	9	4	3	2.375	1.33333	1.8	1.33333	1	1.77273	39	39	73	2	1
ESD
ESD
NoESD
NoESD
ESD
ESD
ESD
NoESD	1	1	2	1	1	1	1	1	1	1	1	1	1	1	1	1	1	1	1	1	1	1	9	3	5	3	3	1.125	1	1	1	1	1.04545	23	23	84	1	1
NoESD
NoESD
NoESD	2	1	1	1	2	3	1	1	1	1	1	2	1	1	1	1	1	1	1	1	1	1	10	4	5	5	3	1.25	1.33333	1	1.66667	1	1.22727	27	27
NoESD
NoESD
ESD
NoESD
NoESD	1	1	1	1	1	1	1	1	1	1	1	1	1	1	1	1	1	1	1	1	1	1	8	3	5	3	3	1	1	1	1	1	1	22	22
NoESD
NoESD	3	3	3	3	2	4	3	3	1	4	3	3	3	3	3	2	3	1	3	3	3	2	24	8	13	9	7	3	2.66667	2.6	3	2.33333	2.77273	61	61		2	1
NoESD
NoESD
ESD	1	1	1	1	1	1	1	1	1	1	1	1	1	1	1	1	1	1	1	1	1	1	8	3	5	3	3	1	1	1	1	1	1	22	22	58	1	1
NoESD
NoESD	4	4	4	4	3	4	4	3	1	3	2	3	2	3	3	2	1	1	3	4	4	1	28	7	15	8	5	3.5	2.33333	3	2.66667	1.66667	2.86364	63	63	68	2	1
NoESD
ESD	3	1	1	1	1	1	1	1	1	1	1	1	1	1	1	1	1	1	1	1	1	1	10	3	5	3	3	1.25	1	1	1	1	1.09091	24	24		2	1
NoESD
NoESD
ESD
ESD
NoESD
NoESD
NoESD
NoESD
NoESD	1	1	3	4	3	4	3	1	1	3	4	3	1	1	1	1	1	1	3	4	3	1	21	5	10	9	3	2.625	1.66667	2	3	1	2.18182	48	48	55	2	1
NoESD
NoESD
NoESD	4	3	3	4	2	3	3	3	1	2	1	2	2	2	3	1	1	1	3	4	3	1	23	6	13	5	5	2.875	2	2.6	1.66667	1.66667	2.36364	52	52	71	2	1
ESD
NoESD
NoESD
NoESD
NoESD
NoESD	1	1	1	1	2	1	1	1	1	1	1	1	1	1	1	1	1	1	1	1	1	1	9	3	5	3	3	1.125	1	1	1	1	1.04545	23	23	59	2	3
NoESD	3	1	2	2	2	1	1	2	1	4	1	3	1	3	1	1	1	1	2	2	2	1	19	6	7	3	3	2.375	2	1.4	1	1	1.72727	38	38
NoESD	4	4	4	4	4	3	3	4	2	4	2	4	3	4	3	1	1	4	3	3	4	1	30	9	18	6	6	3.75	3	3.6	2	2	3.13636	69	69	43	1	2
NoESD	2	2	2	2	2	3	3	3	2	3	1	2	2	1	3	1	1	2	3	3	2	2	18	7	11	5	6	2.25	2.33333	2.2	1.66667	2	2.13636	47	47
NoESD	2	1	3	1	2	2	1	1	2	4	2	3	2	1	4	1	2	2	2	2	3	1	16	5	10	5	8	2	1.66667	2	1.66667	2.66667	2	44	44
NoESD	1	1	1	1	1	1	1	1	1	1	1	1	1	1	1	1	1	1	1	1	1	1	8	3	5	3	3	1	1	1	1	1	1	22	22
NoESD
NoESD	1	1	2	1	1	1	1	1	1	1	1	1	1	1	1	1	1	1	1	1	1	1	9	3	5	3	3	1.125	1	1	1	1	1.04545	23	23		2	1
ESD
NoESD	4	2	4	3	3	1	4	2	1	4	2	3	1	3	4	1	1	4	4	2	2	3	29	8	11	4	6	3.625	2.66667	2.2	1.33333	2	2.63636	58	58		2	3
NoESD
ESD
NoESD
NoESD	3	1	2	1	1	3	1	3	1	1	2	3	1	1	1	3	1	1	1	1	2	2	11	8	6	8	3	1.375	2.66667	1.2	2.66667	1	1.63636	36	36
NoESD
NoESD	4	1	4	2	3	1	3	1	1	3	1	3	3	2	2	1	1	3	3	4	4	1	24	5	15	3	4	3	1.66667	3	1	1.33333	2.31818	51	51	55	2	1
ESD	3	1	3	1	1	3	1	1	1	3	1	1	2	1	1	1	1	1	2	1	1	1	15	3	6	5	3	1.875	1	1.2	1.66667	1	1.45455	32	32		2	1
NoESD	1	1	1	1	1	3	1	1	1	1	1	1	1	1	1	1	1	1	1	1	1	1	8	3	5	5	3	1	1	1	1.66667	1	1.09091	24	24		2	1
NoESD	1	1	1	1	1	1	1	1	1	1	1	1	1	1	1	1	1	1	1	1	2	1	8	3	6	3	3	1	1	1.2	1	1	1.04545	23	23	73	2	1
NoESD	1	1	1	1	1	3	2	1	1	1	2	1	1	1	2	1	1	1	1	1	1	1	9	3	5	6	4	1.125	1	1	2	1.33333	1.22727	27	27		1
ESD
ESD	3	1	1	1	1	1	1	1	1	1	1	1	1	2	3	1	1	1	1	1	1	1	11	3	5	3	5	1.375	1	1	1	1.66667	1.22727	27	27
NoESD
ESD
ESD	3	1	1	1	1	1	2	1	1	1	1	1	1	1	1	1	1	1	1	1	3	1	11	3	7	3	3	1.375	1	1.4	1	1	1.22727	27	27
ESD
NoESD
NoESD
NoESD
NoESD
NoESD
ESD
ESD
NoESD	2	1	2	1	1	2	2	2	1	2	1	1	1	1	1	1	1	1	1	1	2	1	12	4	6	4	3	1.5	1.33333	1.2	1.33333	1	1.31818	29	29	41	2	1
ESD	1	1	1	1	1	1	1	1	1	1	1	1	1	1	1	1	1	1	1	1	1	1	8	3	5	3	3	1	1	1	1	1	1	22	22
NoESD
NoESD
NoESD
NoESD
ESD
ESD	1	1	1	1	1	3	1	1	1	1	3	1	1	1	1	1	1	1	1	1	1	1	8	3	5	7	3	1	1	1	2.33333	1	1.18182	26	26		1	1
NoESD	4	4	4	4	4	4	4	4	3	4	4	4	3	4	3	4	3	4	4	4	4	4	32	12	19	12	9	4	4	3.8	4	3	3.81818	84	84	54	2	1
ESD	3	1	3	1	1	3	1	3	1	3	1	3	1	3	3	1	1	3	3	1	2	1	18	7	8	5	5	2.25	2.33333	1.6	1.66667	1.66667	1.95455	43	43	63	1	1
ESD	1	1	1	1	1	1	1	1	1	1	1	1	1	1	1	1	1	1	1	1	1	1	8	3	5	3	3	1	1	1	1	1	1	22	22	49	2	3
ESD
NoESD
NoESD
ESD	1	1	1	1	1	1	1	1	1	1	1	1	1	1	1	1	1	1	1	1	1	1	8	3	5	3	3	1	1	1	1	1	1	22	22
NoESD
NoESD
NoESD
NoESD
NoESD
NoESD	1	1	1	1	1	1	1	1	1	1	1	1	1	1	1	1	1	1	1	2	3	2	8	4	8	3	3	1	1.33333	1.6	1	1	1.18182	26	26	66	2	1
NoESD
ESD	1	1	1	1	1	1	2	1	1	1	1	1	1	1	1	1	1	1	1	1	1	1	9	3	5	3	3	1.125	1	1	1	1	1.04545	23	23	65	2	1
NoESD
NoESD
ESD	1	1	2	2	1	3	2	3	1	2	3	3	2	1	1	3	1	1	3	1	2	3	14	9	7	9	3	1.75	3	1.4	3	1	1.90909	42	42	80	2	1
NoESD	4	3	4	3	2	3	3	3	1	3	1	3	2	3	3	1	1	3	3	4	3	3	25	9	15	5	5	3.125	3	3	1.66667	1.66667	2.68182	59	59	46	2	1
NoESD
NoESD
NoESD
NoESD	3	2	3	2	2	4	3	2	1	3	3	3	1	1	1	3	1	3	2	2	4	1	19	6	12	10	3	2.375	2	2.4	3.33333	1	2.27273	50	50
NoESD
NoESD
NoESD	3	2	3	1	3	2	2	2	3	3	2	2	2	2	2	2	3	2	3	2	3	3	20	7	11	6	8	2.5	2.33333	2.2	2	2.66667	2.36364	52	52	81	2	7
NoESD
NoESD
NoESD	1	2	3	1	1	3	3	3	1	3	1	3	1	1	3	1	1	1	2	2	3	3	15	9	9	5	5	1.875	3	1.8	1.66667	1.66667	1.95455	43	43	77	2	1
NoESD
NoESD
ESD
NoESD
NoESD
NoESD
ESD	1	1	2	1	3	1	1	3	1	3	1	3	1	1	3	1	1	1	1	3	1	2	13	8	7	3	5	1.625	2.66667	1.4	1	1.66667	1.63636	36	36
NoESD
NoESD
NoESD
NoESD
NoESD
NoESD
ESD
NoESD
NoESD
NoESD
NoESD	3	1	4	4	3	2	1	3	1	4	1	3	3	3	3	1	1	3	3	1	2	1	25	7	10	4	5	3.125	2.33333	2	1.33333	1.66667	2.31818	51	51
NoESD
NoESD
NoESD	1	1	1	1	1	3	1	1	1	3	2	1	1	1	1	1	1	1	2	1	1	1	11	3	5	6	3	1.375	1	1	2	1	1.27273	28	28
ESD
ESD
ESD
ESD
ESD	3	3	3	3	2	2	3	3	2	3	1	2	1	1	3	1	1	1	1	1	2	1	19	6	8	4	6	2.375	2	1.6	1.33333	2	1.95455	43	43	56	2	1
NoESD
NoESD	4	3	3	3	2	3	3	4	1	3	2	2	1	3	3	1	1	2	4	4	4	4	25	10	14	6	5	3.125	3.33333	2.8	2	1.66667	2.72727	60	60
ESD
NoESD
NoESD
ESD
NoESD
NoESD	1	1	2	1	1	2	1	1	1	1	1	1	1	1	1	1	1	1	1	1	2	1	9	3	6	4	3	1.125	1	1.2	1.33333	1	1.13636	25	25	70	2	1
NoESD

## Sheet: health care services
KOD	ny_strokeenhet	sluten rehab period 1	vårdats_enbart_på_B81	dagrehab period 1	stroketema period 1	primärvård_enhet period 1	outpatient total period1	sluten rehab p2	arbetsrehab p2	stroketeam p2	mottagn enhet p2	rehab total p2	sluten rehab p3-4	enheter/mottag total3+4	stroketeam/hemrehab total3+4	dag/arbetsrehab 3+4	out-patient rehab total3+4	in-patient rehab	arbetsd/dagrehab 1-4	stroketeam/hemrehab 1-4	ESD service 1-4	primärvård 1-4	övrig out-patient rehab 1-4	out-patient total 1-4	ny strokeenhet+inpatient rehab p1-4	strokeennet_sluten rehab p1	sluten_rehab p2-p4
NoESD	16	54		0	0	0	0	0	0	0	0	0	0	0	0	0	0	54	0	0	0	0	0	0	70	70	0
NoESD	15	39		0	0	0	0	20	24	0	0	24	0	0	0	52	52	59	76	0	0	0	0	76	74	54	20
NoESD	7	14		0	0	12	12	0	0	0	23	23	0	41	0	0	41	14	0	0	0	90	90	90	21	21	0
ESD	3	29		0	13	0	13	0	0	30	0	30	0	2	57	0	59	29	0	100	100	2	2	102	32	32	0
ESD	2	0		0	11	0	11	0	0	0	0	0	0	0	0	0	0	0	0	11	11	0	0	11	2	2	0
NoESD	7	23		0	4	0	4	0	0	10	8	18	0	6	0	0	6	23	0	14	0	16	30	30	30	30	0
NoESD	7	0		0	0	1	1	0	0	0	11	11	0	9	0	40	49	0	40	0	0	40	40	80	7	7	0
ESD	4	0		0	16	0	16	0	0	21	0	21	0	0	0	0	0	0	0	37	37	0	0	37	4	4	0
ESD	6	14		0	8	0	8	0	0	2	3	5	0	0	0	0	0	14	0	10	10	3	3	13	20	20	0
ESD	10	26		0	13	0	13	0	0	25	0	25	0	20	7	0	27	26	0	45	45	20	20	65	36	36	0
NoESD	5	7		0	0	8	8	0	0	0	11	11	0	1	0	0	1	7	0	0	0	20	20	20	12	12	0
NoESD	8	12		0	0	1	1	0	0	0	0	0	0	0	0	0	0	12	0	0	0	1	1	1	20	20	0
NoESD	8	12		0	0	0	0	0	0	0	0	0	0	0	0	0	0	12	0	0	0	0	0	0	20	20	0
NoESD	3	0		0	0	3	3	0	0	0	0	0	0	0	0	0	0	0	0	0	0	3	3	3	3	3	0
NoESD	6	28		0	0	1	1	0	0	0	0	0	0	1	0	0	1	28	0	0	0	2	2	2	34	34	0
NoESD	6	13		0	0	2	2	0	0	0	1	1	0	0	0	0	0	13	0	0	0	3	3	3	19	19	0
ESD	8	0		0	5	0	5	0	0	4	0	4	0	9	3	0	12	0	0	12	12	9	9	21	8	8	0
NoESD	7	0		0	0	0	0	0	0	0	6	6	0	6	0	0	6	0	0	0	0	12	12	12	7	7	0
NoESD	7	15		6	0	1	7	0	30	0	0	30	0	1	0	24	25	15	60	0	0	2	2	62	22	22	0
NoESD	8	21		0	0	5	5	0	0	0	0	0	0	0	0	0	0	21	0	0	0	5	5	5	29	29	0
NoESD	8	0		0	0	5	5	0	0	0	0	0	0	0	0	0	0	0	0	0	0	5	5	5	8	8	0
NoESD	6	0		0	0	0	0	0	0	0	1	1	0	0	0	0	0	0	0	0	0	1	1	1	6	6	0
NoESD	2	8		0	0	1	1	0	0	0	0	0	0	0	0	0	0	8	0	0	0	1	1	1	10	10	0
ESD	1	0		0	5	0	5	0	0	0	0	0	0	0	0	0	0	0	0	5	5	0	0	5	1	1	0
NoESD	2	4		0	0	0	0	0	0	0	0	0	0	0	0	0	0	4	0	0	0	0	0	0	6	6	0
NoESD			10	0	0	0	0	0	0	0	0	0	0	2	0	0	2	10	0	0	0	2	2	2	10	10	0
NoESD	7	4		0	0	0	0	0	0	0	0	0	0	0	0	0	0	4	0	0	0	0	0	0	11	11	0
ESD	6	6		0	2	0	2	0	0	0	0	0	0	0	0	0	0	6	0	2	2	0	0	2	12	12	0
NoESD	7	25		0	0	5	5	0	0	0	4	4	0	23	0	0	23	25	0	0	0	32	32	32	32	32	0
NoESD	7	21		0	0	0	0	0	0	0	0	0	0	0	0	0	0	21	0	0	0	0	0	0	28	28	0
ESD	3	0		0	11	0	11	0	0	1	0	1	0	0	0	0	0	0	0	12	12	0	0	12	3	3	0
ESD	8	42		0	8	0	8	0	0	21	0	21	0	1	40	0	41	42	0	69	69	1	1	70	50	50	0
NoESD	4	0		0	0	0	0	0	0	0	0	0	0	0	0	23	23	0	23	0	0	0	0	23	4	4	0
NoESD	9	0		0	1	0	1	0	0	0	0	0	0	5	0	0	5	0	0	1	0	5	6	6	9	9	0
NoESD	5	14		0	0	0	0	0	0	0	0	0	0	0	0	0	0	14	0	0	0	0	0	0	19	19	0
NoESD	4	0		0	0	3	3	0	0	0	0	0	0	0	0	0	0	0	0	0	0	3	3	3	4	4	0
NoESD	7	16		1	0	15	16	0	0	0	10	10	0	1	0	22	23	16	23	0	0	26	26	49	23	23	0
NoESD	6	9		0	0	0	0	0	0	0	0	0	0	0	0	0	0	9	0	0	0	0	0	0	15	15	0
NoESD	2	0		0	0	0	0	0	0	0	1	1	0	0	0	0	0	0	0	0	0	1	1	1	2	2	0
NoESD	2	15		0	24	0	24	0	0	17	2	19	34	12	5	0	17	49	0	46	0	14	60	60	51	17	34
ESD	5	0		0	3	0	3	0	0	0	0	0	0	0	0	0	0	0	0	3	3	0	0	3	5	5	0
NoESD	13	19		0	2	0	2	0	0	0	0	0	0	0	0	0	0	19	0	2	0	0	2	2	32	32	0
NoESD	7	35		0	0	4	4	0	0	0	0	0	0	2	0	0	2	35	0	0	0	6	6	6	42	42	0
NoESD	9	20		0	0	9	9	0	0	0	16	16	0	4	0	0	4	20	0	0	0	30	30	30	29	29	0
NoESD	6	10		0	0	0	0	0	0	0	0	0	0	0	0	0	0	10	0	0	0	0	0	0	16	16	0
NoESD	14	0		0	0	0	0	0	0	0	3	3	0	0	0	0	0	0	0	0	0	3	3	3	14	14	0
NoESD	5	11		0	0	0	0	0	0	0	0	0	0	0	0	0	0	11	0	0	0	0	0	0	16	16	0
NoESD	10	15		0	0	5	5	0	0	0	0	0	38	0	0	0	0	53	0	0	0	5	5	5	63	25	38
NoESD	6	8		0	0	2	2	0	0	0	0	0	0	0	0	0	0	8	0	0	0	2	2	2	14	14	0
NoESD	5	8		0	0	1	1	0	0	0	0	0	0	0	0	0	0	8	0	0	0	1	1	1	13	13	0
NoESD	7	0		0	0	9	9	0	0	0	1	1	0	0	0	0	0	0	0	0	0	10	10	10	7	7	0
NoESD	7	0		0	0	0	0	0	19	0	0	19	0	0	0	8	8	0	27	0	0	0	0	27	7	7	0
NoESD	7	7		0	0	0	0	0	0	0	0	0	0	0	0	0	0	7	0	0	0	0	0	0	14	14	0
ESD	7	0		0	2	0	2	0	0	0	0	0	0	0	0	0	0	0	0	2	2	0	0	2	7	7	0
NoESD	8	16		0	0	0	0	0	0	0	0	0	0	0	0	0	0	16	0	0	0	0	0	0	24	24	0
NoESD	8	1		0	0	3	3	0	0	0	0	0	0	4	0	0	4	1	0	0	0	7	7	7	9	9	0
ESD	8	0		0	28	0	28	0	0	25	0	25	0	0	6	0	6	0	0	59	59	0	0	59	8	8	0
NoESD	13	31		0	0	4	4	0	2	0	3	5	0	0	0	0	0	31	2	0	0	8	8	10	44	44	0
NoESD	7	0		0	0	1	1	0	0	0	0	0	0	0	0	0	0	0	0	0	0	1	1	1	7	7	0
NoESD	5	10		0	0	14	14	0	0	0	1	1	0	0	0	0	0	10	0	0	0	15	15	15	15	15	0
NoESD	10	0		0	0	0	0	0	0	0	1	1	0	0	0	0	0	0	0	0	0	1	1	1	10	10	0
ESD	5	0		0	2	0	2	0	0	0	0	0	0	0	0	0	0	0	0	2	2	0	0	2	5	5	0
NoESD	5	0		0	0	1	1	0	0	0	0	0	0	0	0	0	0	0	0	0	0	1	1	1	5	5	0
NoESD	6	0		0	0	0	0	0	0	0	1	1	0	0	0	0	0	0	0	0	0	1	1	1	6	6	0
NoESD	2	11		0	0	0	0	0	0	0	3	3	0	13	0	0	13	11	0	0	0	16	16	16	13	13	0
ESD	6	0		0	21	1	22	0	0	4	0	4	0	0	0	0	0	0	0	25	25	1	1	26	6	6	0
ESD	5	28		0	9	0	9	0	0	0	0	0	0	0	0	0	0	28	0	9	9	0	0	9	33	33	0
NoESD	19	21		0	0	1	1	0	0	15	0	15	0	0	20	0	20	21	0	35	0	1	36	36	40	40	0
ESD	10	11		0	22	0	22	0	0	6	0	6	0	0	0	0	0	11	0	28	28	0	0	28	21	21	0
ESD	5	0		0	13	0	13	0	0	5	0	5	0	0	0	0	0	0	0	18	18	0	0	18	5	5	0
ESD	6	0		0	22	0	22	0	0	23	0	23	0	1	20	0	21	0	0	65	65	1	1	66	6	6	0
NoESD	10	0		0	0	0	0	0	0	0	0	0	0	0	0	0	0	0	0	0	0	0	0	0	10	10	0
NoESD	8	37		10	0	0	10	0	23	0	0	23	0	0	0	7	7	37	40	0	0	0	0	40	45	45	0
NoESD	6	7		0	0	2	2	0	0	0	0	0	0	5	0	0	5	7	0	0	0	7	7	7	13	13	0
NoESD	3	0		0	0	2	2	0	0	0	6	6	0	19	0	0	19	0	0	0	0	27	27	27	3	3	0
NoESD	4	0		0	0	3	3	0	0	0	1	1	0	1	0	0	1	0	0	0	0	5	5	5	4	4	0
ESD	7	0		0	19	0	19	0	0	2	0	2	0	0	0	0	0	0	0	21	21	0	0	21	7	7	0
ESD	5	35		0	13	0	13	0	0	3	0	3	0	0	0	0	0	35	0	16	16	0	0	16	40	40	0
NoESD	5	47		1	0	0	1	0	23	0	0	23	0	0	0	0	0	47	24	0	0	0	0	24	52	52	0
ESD	2	0		0	5	13	18	0	0	0	6	6	0	0	0	0	0	0	0	5	5	19	19	24	2	2	0
NoESD	9	0		0	0	0	0	0	0	0	4	4	0	15	0	11	26	0	11	0	0	19	19	30	9	9	0
NoESD	8	13		0	0	1	1	0	0	0	1	1	0	0	0	0	0	13	0	0	0	2	2	2	21	21	0
NoESD	23	19		0	0	2	2	0	0	0	0	0	57	3	0	0	3	76	0	0	0	5	5	5	99	42	57
NoESD	7	0		0	0	1	1	0	0	4	2	6	0	0	15	0	15	0	0	19	0	4	23	23	7	7	0
ESD	5	14		0	7	0	7	0	0	9	0	9	0	0	1	0	1	14	0	17	17	0	0	17	19	19	0
ESD	2	0		0	6	0	6	0	0	0	0	0	0	0	0	0	0	0	0	6	6	0	0	6	2	2	0
NoESD	15	21		0	0	0	0	0	0	0	0	0	0	0	0	0	0	21	0	0	0	0	0	0	36	36	0
ESD	8	58		0	16	0	16	0	0	32	0	32	0	0	17	11	28	58	11	65	65	0	0	76	66	66	0
ESD	6	0		0	22	0	22	0	0	2	0	2	0	0	0	0	0	0	0	24	24	0	0	24	6	6	0
ESD	4	0		0	13	0	13	0	0	0	0	0	0	0	0	0	0	0	0	13	13	0	0	13	4	4	0
NoESD	7	28		0	0	11	11	0	0	0	0	0	0	0	0	2	2	28	2	0	0	11	11	13	35	35	0
NoESD	5	10		0	0	1	1	0	0	0	0	0	0	0	0	0	0	10	0	0	0	1	1	1	15	15	0
ESD	6	8		0	2	0	2	0	0	0	0	0	0	0	0	0	0	8	0	2	2	0	0	2	14	14	0
NoESD			9	0	0	0	0	0	0	0	0	0	0	0	0	0	0	9	0	0	0	0	0	0	9	9	0
NoESD	4	10		0	0	0	0	0	0	0	0	0	0	5	0	0	5	10	0	0	0	5	5	5	14	14	0
NoESD	4	18		0	0	1	1	0	0	0	0	0	0	0	0	0	0	18	0	0	0	1	1	1	22	22	0
NoESD	12	22		0	0	0	0	0	0	0	1	1	0	0	0	0	0	22	0	0	0	1	1	1	34	34	0
NoESD	9	14		0	0	0	0	0	0	0	0	0	0	0	0	0	0	14	0	0	0	0	0	0	23	23	0
NoESD	5	16		0	0	0	0	0	0	0	0	0	0	0	0	0	0	16	0	0	0	0	0	0	21	21	0
NoESD	1	13		0	0	0	0	0	0	0	0	0	0	0	0	0	0	13	0	0	0	0	0	0	14	14	0
ESD	3	0		0	16	0	16	0	2	2	0	4	0	0	0	0	0	0	2	18	18	0	0	20	3	3	0
NoESD	8	0		0	0	0	0	0	0	0	2	2	0	0	0	0	0	0	0	0	0	2	2	2	8	8	0
NoESD	12	41		1	0	2	3	0	24	0	0	24	0	1	0	2	3	41	27	0	0	3	3	30	53	53	0
ESD	5	0		0	5	0	5	0	0	0	0	0	0	4	0	0	4	0	0	5	5	4	4	9	5	5	0
NoESD	3	0		0	0	0	0	0	0	0	0	0	0	5	4	0	9	0	0	4	0	5	9	9	3	3	0
NoESD	4	10		0	0	0	0	0	0	0	0	0	0	0	0	0	0	10	0	0	0	0	0	0	14	14	0
NoESD	3	41		0	0	1	1	0	0	0	1	1	0	6	0	0	6	41	0	0	0	8	8	8	44	44	0
NoESD	7	25		0	0	0	0	0	0	0	2	2	0	0	0	0	0	25	0	0	0	2	2	2	32	32	0
NoESD	11	0		8	0	0	8	0	27	0	2	29	0	0	0	1	1	0	36	0	0	2	2	38	11	11	0
NoESD	3	17		0	0	0	0	0	0	0	0	0	0	0	0	0	0	17	0	0	0	0	0	0	20	20	0
NoESD	9	20		0	0	1	1	0	1	0	0	1	0	0	0	0	0	20	1	0	0	1	1	2	29	29	0
NoESD	3	8		0	0	0	0	0	0	0	0	0	0	0	0	0	0	8	0	0	0	0	0	0	11	11	0
NoESD	3	15		0	0	0	0	0	0	0	0	0	0	0	0	0	0	15	0	0	0	0	0	0	18	18	0
NoESD	6	10		0	0	0	0	0	0	0	0	0	0	0	0	0	0	10	0	0	0	0	0	0	16	16	0
NoESD	10	0		0	0	2	2	0	0	0	1	1	0	2	0	0	2	0	0	0	0	5	5	5	10	10	0
NoESD	8	0		0	0	1	1	0	0	0	0	0	0	0	0	0	0	0	0	0	0	1	1	1	8	8	0
NoESD	3	0		0	0	6	6	0	0	0	1	1	0	3	0	0	3	0	0	0	0	10	10	10	3	3	0
ESD	9	21		0	34	1	35	0	0	8	0	8	0	0	0	0	0	21	0	42	42	1	1	43	30	30	0
NoESD	25	36		0	0	0	0	0	0	0	0	0	0	0	0	0	0	36	0	0	0	0	0	0	61	61	0
NoESD	15	56		1	0	1	2	0	9	17	0	26	0	0	0	80	80	56	90	17	0	1	18	108	71	71	0
NoESD	4	24		0	0	4	4	0	0	0	4	4	0	7	0	0	7	24	0	0	0	15	15	15	28	28	0
ESD	5	8		0	21	0	21	0	0	15	1	16	0	0	3	0	3	8	0	39	39	1	1	40	13	13	0
NoESD	3	20		0	0	0	0	0	0	0	0	0	0	0	0	0	0	20	0	0	0	0	0	0	23	23	0
NoESD	3	0		0	0	1	1	0	0	0	1	1	0	1	0	0	1	0	0	0	0	3	3	3	3	3	0
NoESD	3	7		0	0	6	6	0	0	0	2	2	0	0	0	0	0	7	0	0	0	8	8	8	10	10	0
NoESD	4	8		0	0	1	1	0	0	0	0	0	0	0	0	0	0	8	0	0	0	1	1	1	12	12	0
NoESD	6	11		0	0	0	0	0	0	0	0	0	0	0	0	0	0	11	0	0	0	0	0	0	17	17	0
NoESD	14	22		0	0	3	3	0	0	0	0	0	0	1	0	0	1	22	0	0	0	4	4	4	36	36	0
ESD	4	6		0	5	0	5	0	0	0	0	0	0	0	0	0	0	6	0	5	5	0	0	5	10	10	0
NoESD	5	0		0	0	1	1	0	0	0	0	0	0	0	0	0	0	0	0	0	0	1	1	1	5	5	0
NoESD	13	0		1	0	3	4	0	3	0	0	3	0	0	0	8	8	0	12	0	0	3	3	15	13	13	0
NoESD	7	0		0	0	1	1	0	0	0	0	0	0	0	0	0	0	0	0	0	0	1	1	1	7	7	0
NoESD	5	9		0	0	0	0	0	0	0	0	0	0	1	0	0	1	9	0	0	0	1	1	1	14	14	0
NoESD	5	11		0	0	0	0	0	0	0	0	0	0	0	0	0	0	11	0	0	0	0	0	0	16	16	0
NoESD	3	0		0	0	1	1	0	0	0	0	0	0	1	0	0	1	0	0	0	0	2	2	2	3	3	0
NoESD	8	14		0	0	0	0	0	0	0	0	0	0	0	0	0	0	14	0	0	0	0	0	0	22	22	0
ESD	17	74		0	3	1	4	11	0	40	0	40	27	4	42	0	46	112	0	85	85	7	7	92	129	91	38
ESD	7	55		0	10	3	13	0	25	16	3	44	0	0	0	54	54	55	79	26	26	6	6	111	62	62	0
ESD	8	0		0	29	0	29	0	26	3	0	29	0	1	0	28	29	0	54	32	32	2	2	88	8	8	0
ESD	13	0		0	10	0	10	0	0	1	1	2	0	0	0	0	0	0	0	11	11	1	1	12	13	13	0
ESD	5	0		0	23	0	23	0	0	3	0	3	0	0	0	0	0	0	0	26	26	0	0	26	5	5	0
NoESD	10	69		1	0	4	5	0	6	0	20	26	0	0	0	37	37	69	44	0	0	24	24	68	79	79	0
NoESD	20	70		0	0	3	3	15	38	0	1	39	0	9	19	6	34	85	44	19	0	13	32	76	105	90	15
ESD	21	0		0	21	0	21	0	0	1	3	4	0	1	0	0	1	0	0	22	22	4	4	26	21	21	0
NoESD	19	63		0	0	0	0	0	15	0	0	15	0	0	0	19	19	63	34	0	0	0	0	34	82	82	0
NoESD	6	13		0	0	0	0	0	0	0	0	0	0	1	0	0	1	13	0	0	0	1	1	1	19	19	0
ESD	4	16		0	10	0	10	0	0	1	0	1	0	0	0	0	0	16	0	11	11	0	0	11	20	20	0
NoESD	13	15		0	0	8	8	0	0	0	3	3	0	0	0	0	0	15	0	0	0	11	11	11	28	28	0
NoESD	4	0		0	4	0	4	0	0	0	4	4	0	0	0	0	0	0	0	4	0	4	8	8	4	4	0
NoESD	9	0		0	0	1	1	0	15	0	0	15	0	1	0	14	15	0	29	0	0	2	2	31	9	9	0
